# Supplementary material for: Facile synthesis of benzo[b]thiophenes via metal-free radical-triggered intramolecular C–S bond formation
Source: Royal Society of Chemistry journal article supplement (doi:10.1039/c7ob01515a), 2017-01-01

## Supporting information

# Facile synthesis of benzo[*b*]thiophenes *via* metal-free radical-triggered intramolecular C-S bond formation

Wei Fan,<sup>a</sup> Kwong-Yuen Chen,<sup>a</sup> Qi-Peng Chen,<sup>a</sup> Guigen Li,<sup>\*,a,b</sup> and Bo Jiang<sup>\*,c</sup>

<sup>a</sup>Institute of Chemistry & BioMedical Sciences, Collaborative Innovation Center of Chemistry for Life Sciences, Nanjing University, Nanjing, 210093, P. R. China

<sup>b</sup>Department of Chemistry and Biochemistry, Texas Tech University, Lubbock, Texas 79409-1061, United States

<sup>c</sup>School of Chemistry and Materials Science, Jiangsu Normal University, Xuzhou, 221116, P. R. China

[jiangchem@jsnu.edu.cn](mailto:jiangchem@jsnu.edu.cn); [guigen.li@ttu.edu](mailto:guigen.li@ttu.edu)

## Table of Contents

|                                                                                           |        |
|-------------------------------------------------------------------------------------------|--------|
| General information-----                                                                  | S2     |
| X-ray Crystallography Structure of Compounds <b>2d</b> -----                              | S2     |
| Intermolecular Competition Experiments-----                                               | S3     |
| Deuterium Kinetic Isotope Effect-----                                                     | S4     |
| Copies of <sup>1</sup> H and <sup>13</sup> C NMR Spectra for Compounds <b>2a-2t</b> ----- | S5-S24 |

### General Information

Melting points were determined in open capillaries and were uncorrected. IR spectra were taken on a FT-IR-Tensor 27 spectrometer in KBr pellets and reported in  $\text{cm}^{-1}$ .  $^1\text{H}$  NMR ( $^{13}\text{C}$  NMR) spectra were measured on a Bruker DPX 400 MHz spectrometer in  $\text{DMSO-}d_6$  or  $\text{DMF-}d_7$  with chemical shift ( $\delta$ ) given in ppm relative to TMS as internal standard [(s = singlet, d = doublet, t = triplet, brs = broad singlet, m = multiplet), coupling constant (Hz)]. HRMS (ESI) was determined by using microTOF-Q II HRMS/MS instrument (BRUKER). X-Ray crystallographic analysis was performed with a Siemens SMART CCD and a Siemens P4 diffractometer.

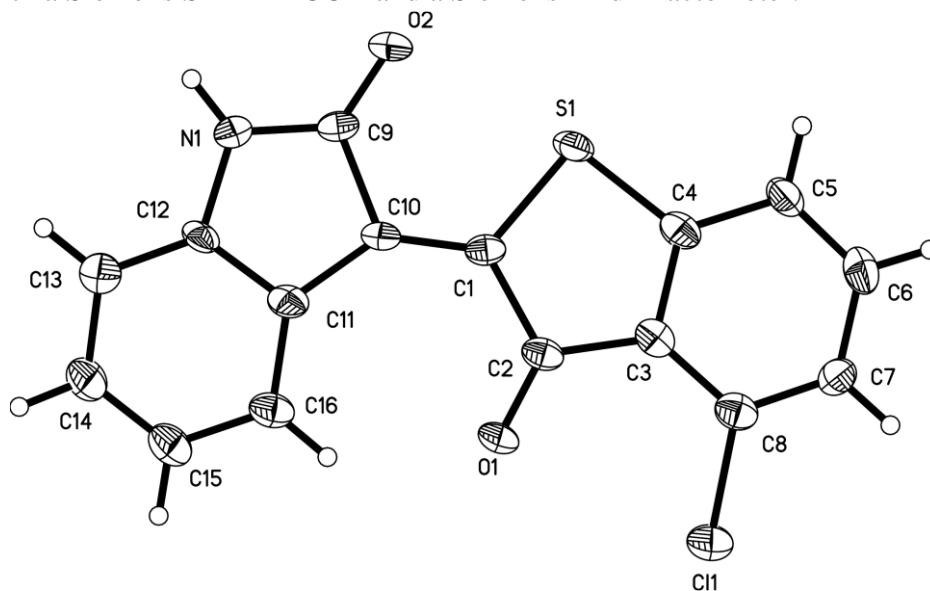

**Fig 1, X-ray Structure of 2d**

Crystal data for **2d**:  $\text{C}_{16}\text{H}_8\text{ClNO}_2\text{S}$ ,  $M_r = 313.74$ , Monoclinic,  $a = 3.8280(2)$  Å,  $b = 13.3111(11)$  Å,  $c = 25.038(2)$  Å,  $U = 1275.64(17)$  Å<sup>3</sup>,  $T = 298(2)$  K, space group  $\text{P2}(1)/n$ ,  $Z = 4$ , 6131 reflections measured, 2219 unique ( $R_{\text{int}} = 0.1893$ ) which were used in all calculation. The final  $wR(F_2)$  was 0.2492 (all data)

### Intermolecular Competition Experiments

Triethylammonium (*Z*)-2-(4-fluorophenyl)-2-oxo-1-(2-oxoindolin-3-ylidene)ethanethiolate (**1b**, 1.0 mmol, 400 mg) and triethylammonium (*Z*)-2-oxo-1-(2-oxoindolin-3-ylidene)-2-(*p*-tolyl)ethanethiolate (**1f**, 1.0 mmol, 396 mg) were introduced into a 10-mL reaction vial. Then I<sub>2</sub> (0.2 mmol, 50.8 mg) and 1,4-dioxane (2.0 mL) were successively added, and the mixture stirred at 120 °C under microwave conditions for 1 h. After completion of the reaction (monitored by TLC), the reaction mixture was down to room temperature. The solid products were collected by Büchner filtration to give **2b** and **2f**.

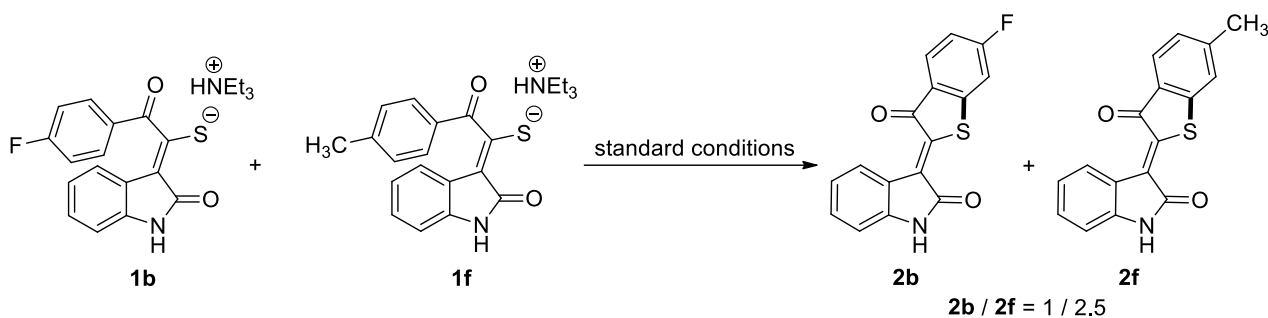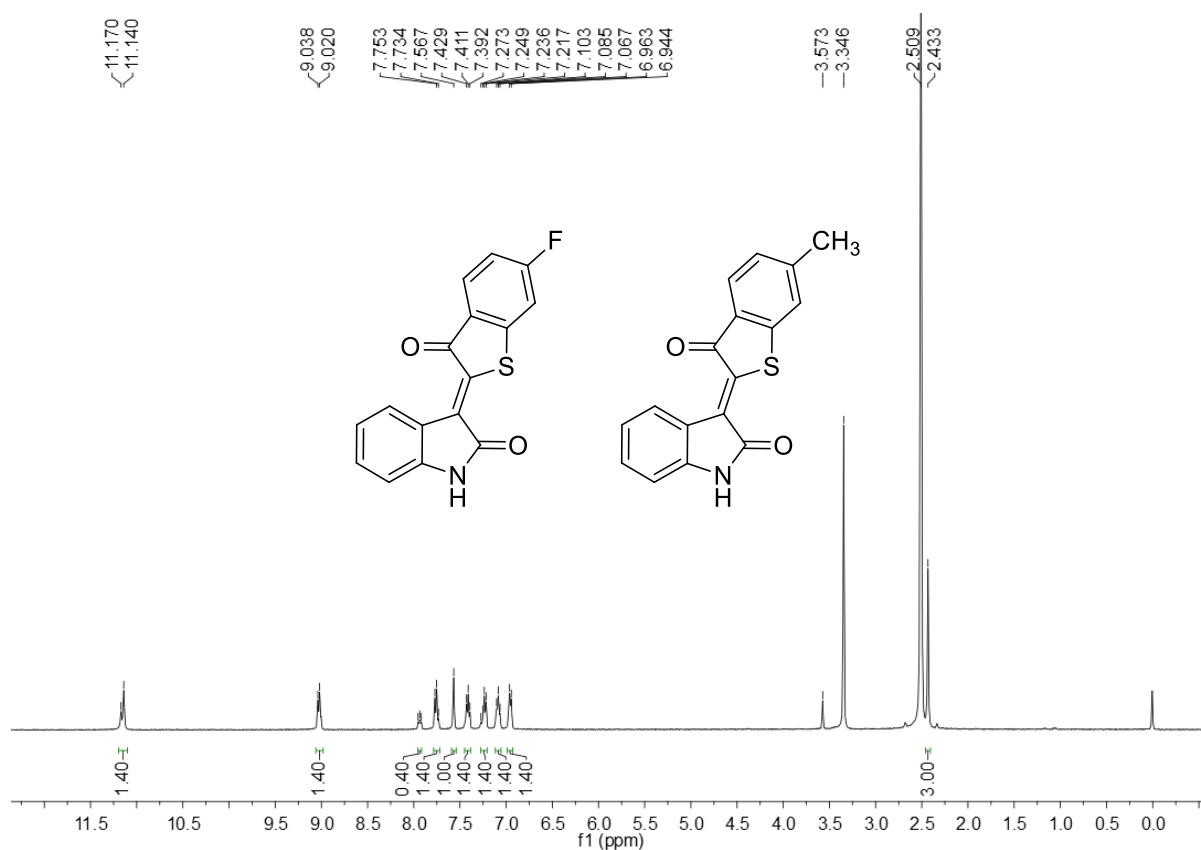

### Deuterium Kinetic Isotope Effect

Triethylammonium (*Z*)-2-oxo-1-(2-oxoindolin-3-ylidene)-2-phenylethanethiolate (**1a**, 0.1 mmol, 38.2 mg) or triethylammonium (*Z*)-2-oxo-1-(2-oxoindolin-3-ylidene)-2-phenyl-*d*<sub>5</sub>-ethanethiolate ([*D*<sub>5</sub>]-**1a**, 0.1 mmol, 38.7 mg) was introduced into a 10-mL reaction vial. Then I<sub>2</sub> (0.02 mmol, 5.08 mg) and 1,4-dioxane (2.0 mL) were successively added, and the mixture stirred at 120 °C under microwave conditions for 5-25 min. After completion of the reaction (monitored by TLC), the reaction mixture was down to room temperature. The solid product was collected by Büchner filtration to give almost pure product **2a** or [*D*<sub>4</sub>]-**2a**.

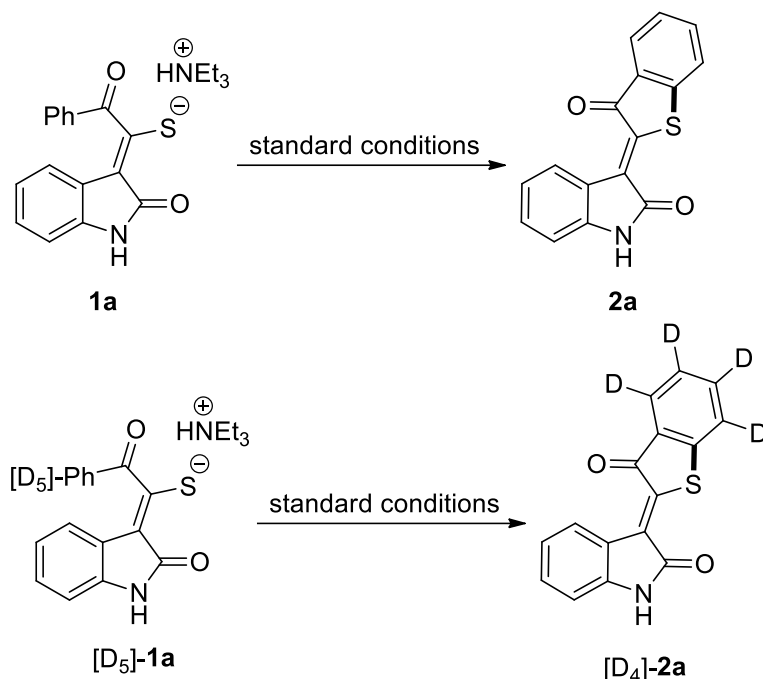

|                                      | Yield of <b>2a</b> or [ <i>D</i> <sub>4</sub> ]- <b>2a</b> |        |        |        |        |
|--------------------------------------|------------------------------------------------------------|--------|--------|--------|--------|
|                                      | 5 min                                                      | 10 min | 15 min | 20 min | 25 min |
| <b>1a</b>                            | 7%                                                         | 14%    | 21%    | 29%    | 36%    |
| [ <i>D</i> <sub>5</sub> ]- <b>1a</b> | 2%                                                         | 4%     | 6%     | 8%     | 10%    |

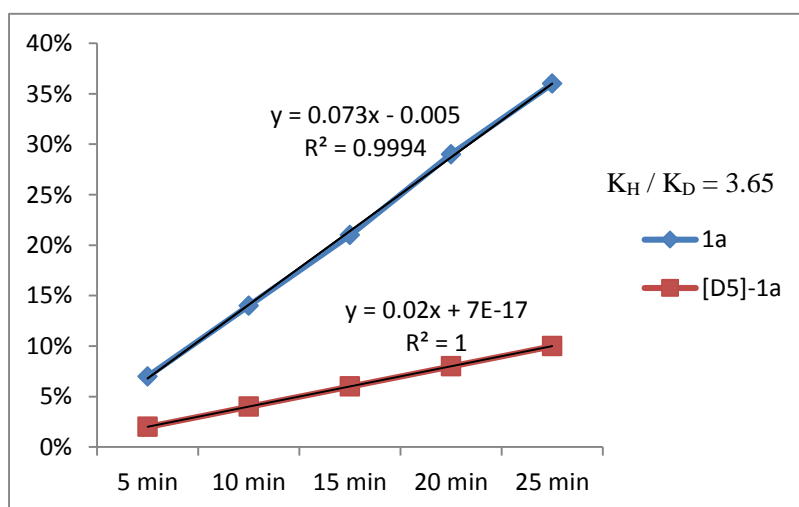

initial rate of **1a** and [*D*<sub>5</sub>]-**1a**

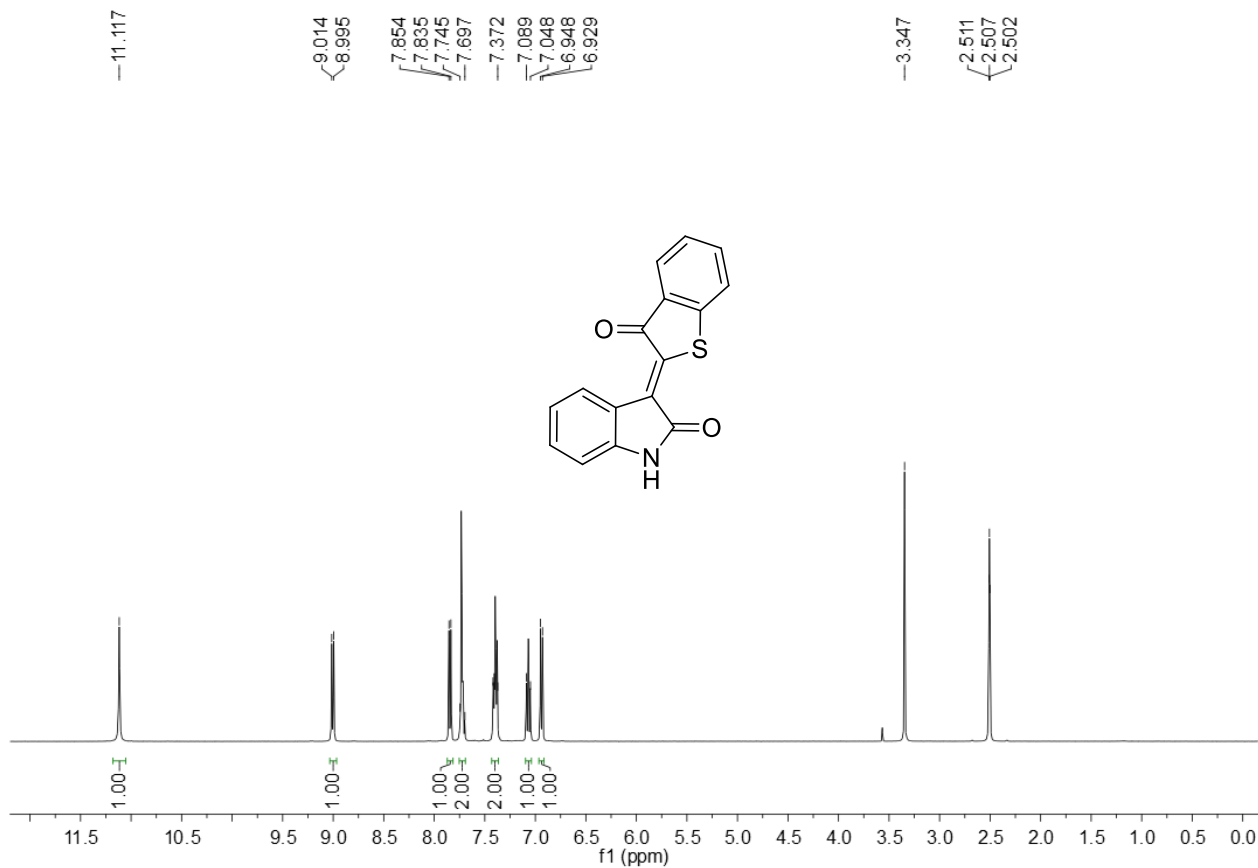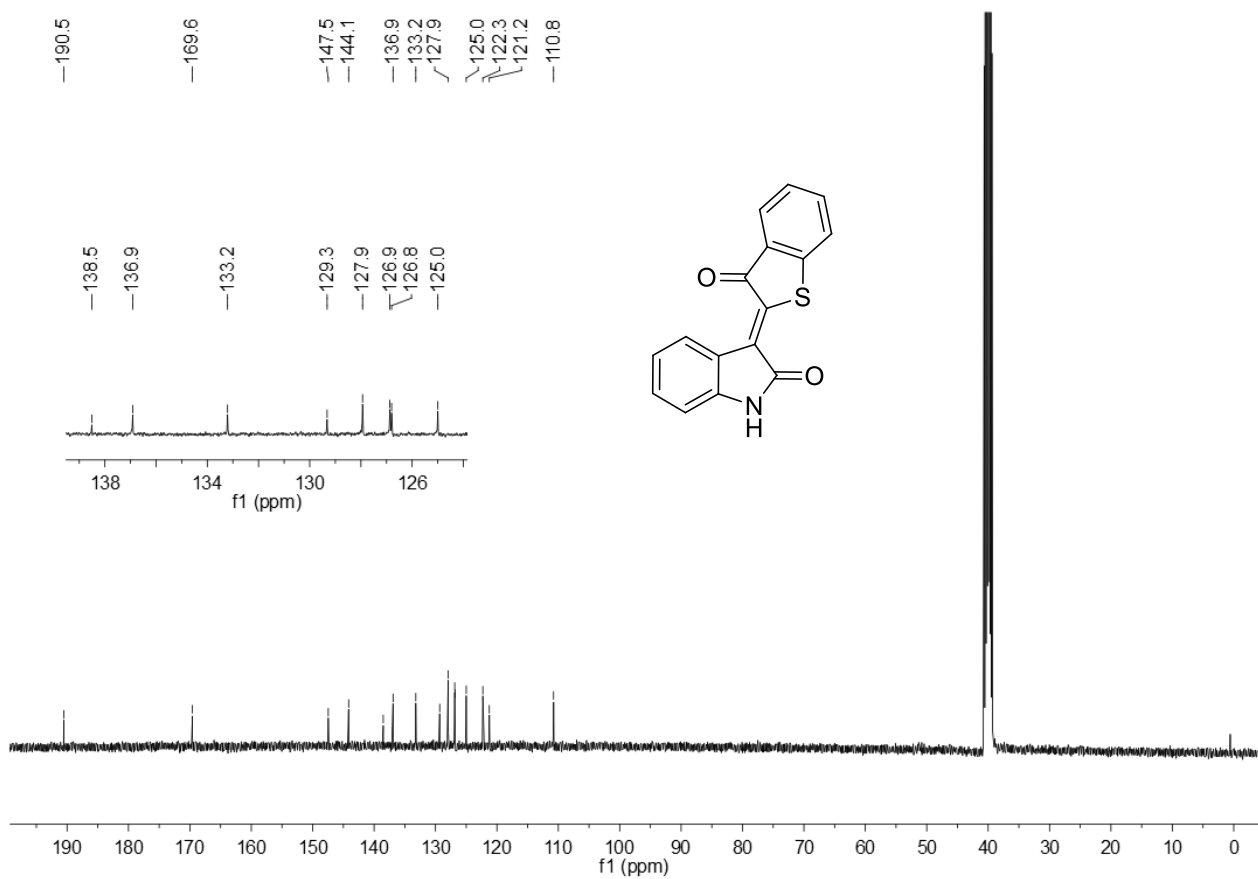

**<sup>13</sup>C NMR Spectrum of Compound 2a**

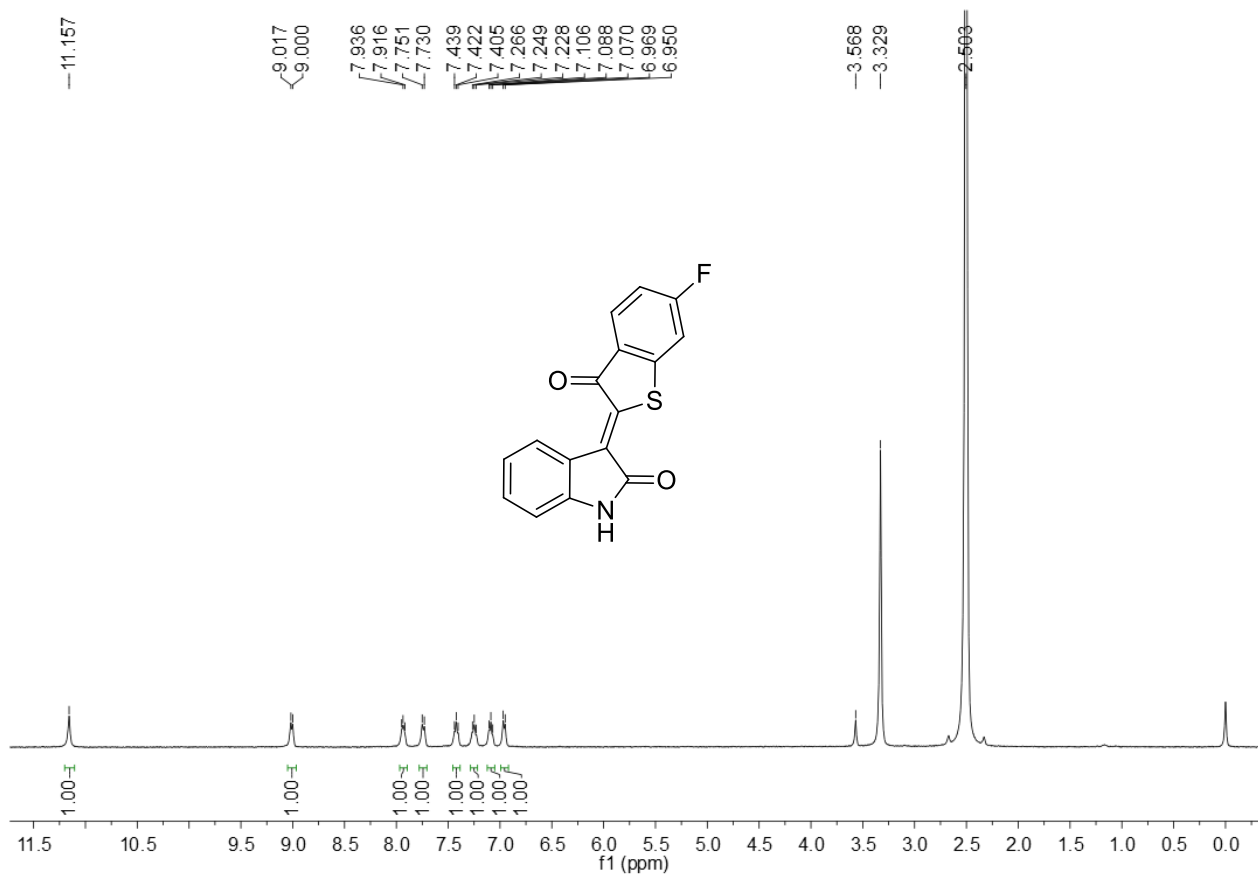

**<sup>1</sup>H NMR Spectrum of Compound 2b**

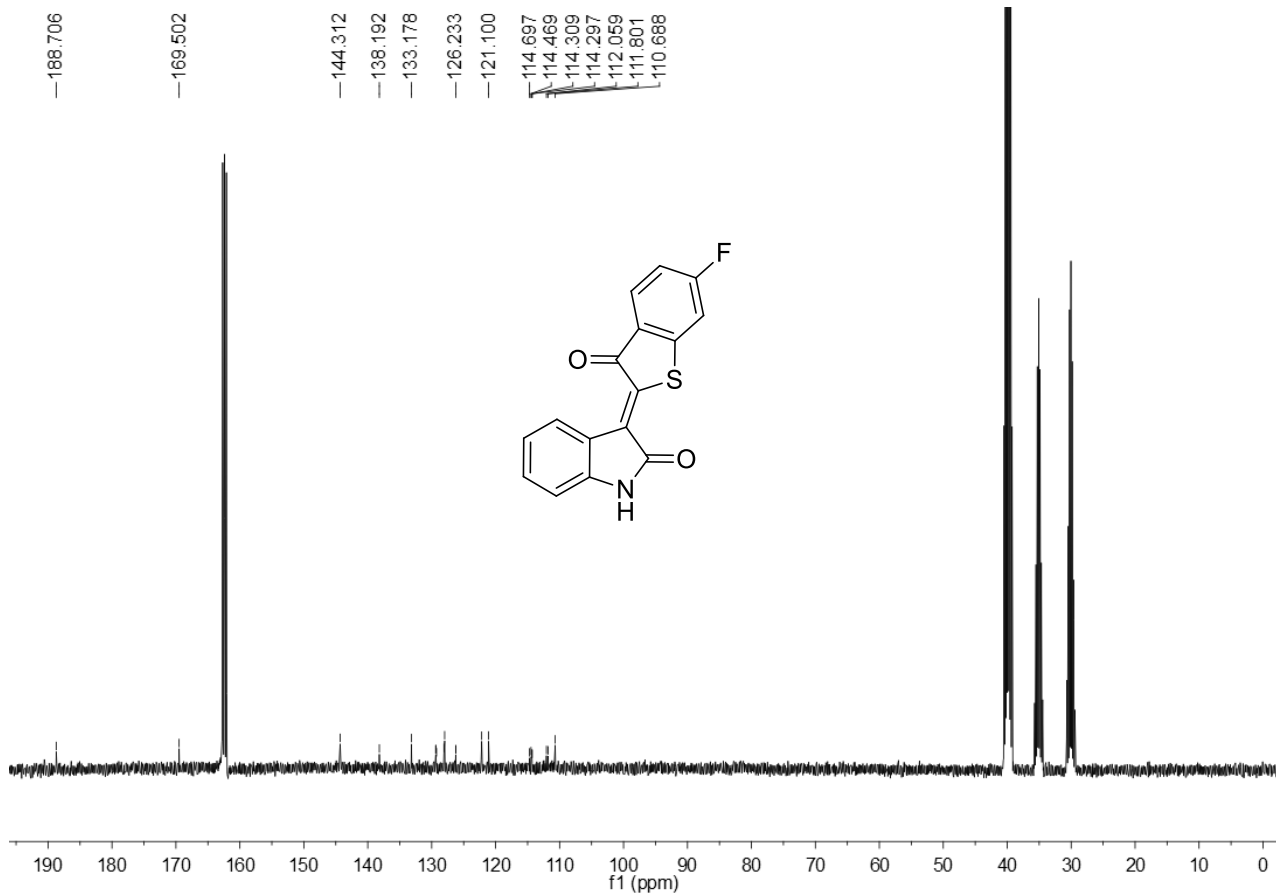

**<sup>13</sup>C NMR Spectrum of Compound 2b**

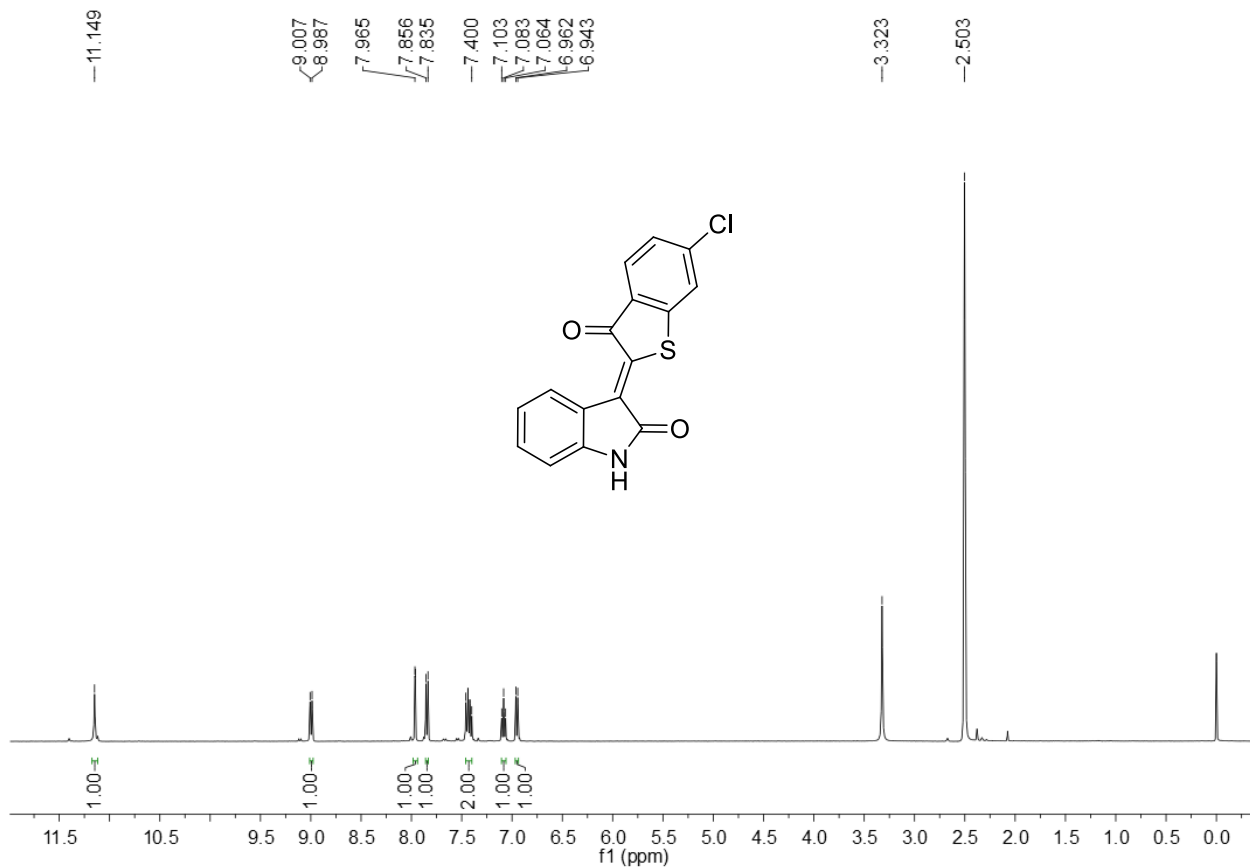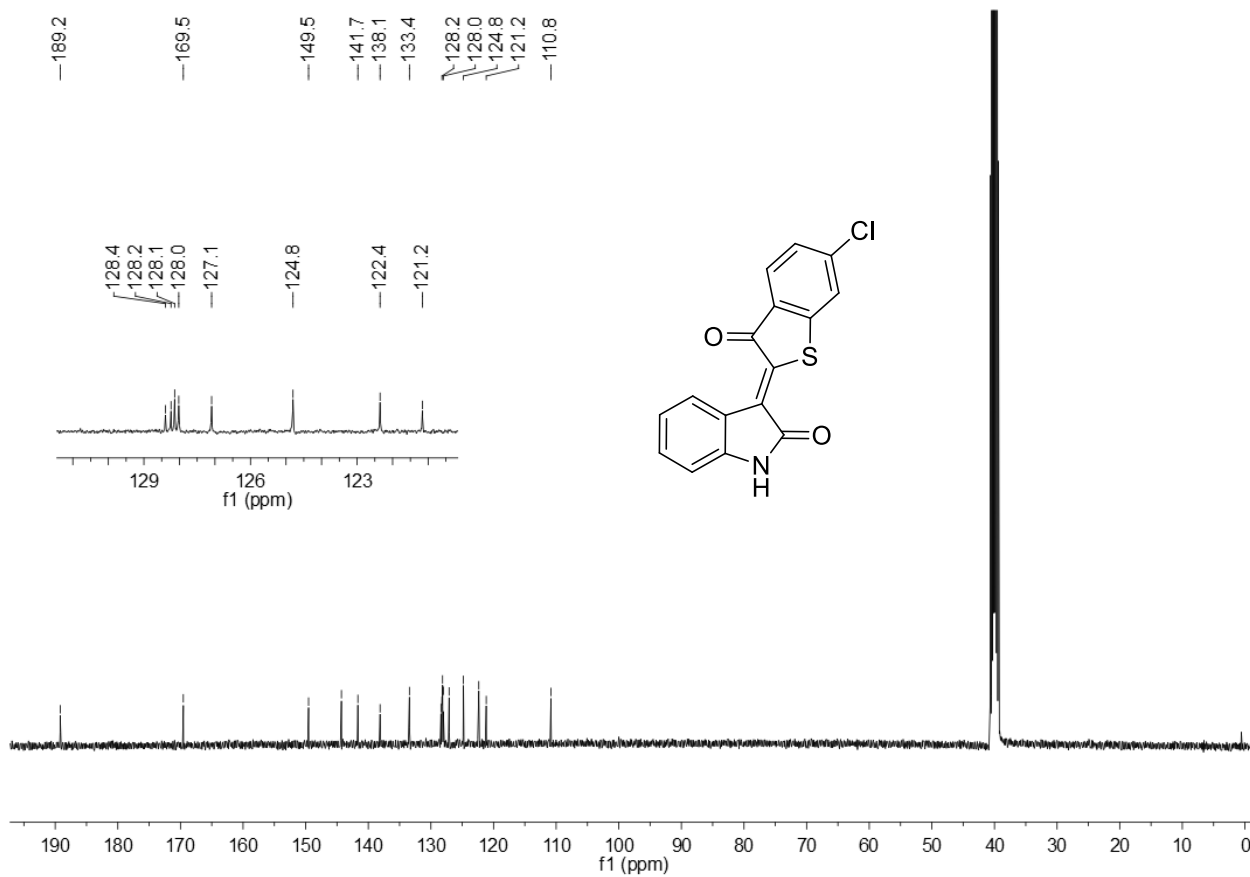

**<sup>13</sup>C NMR Spectrum of Compound 2c**

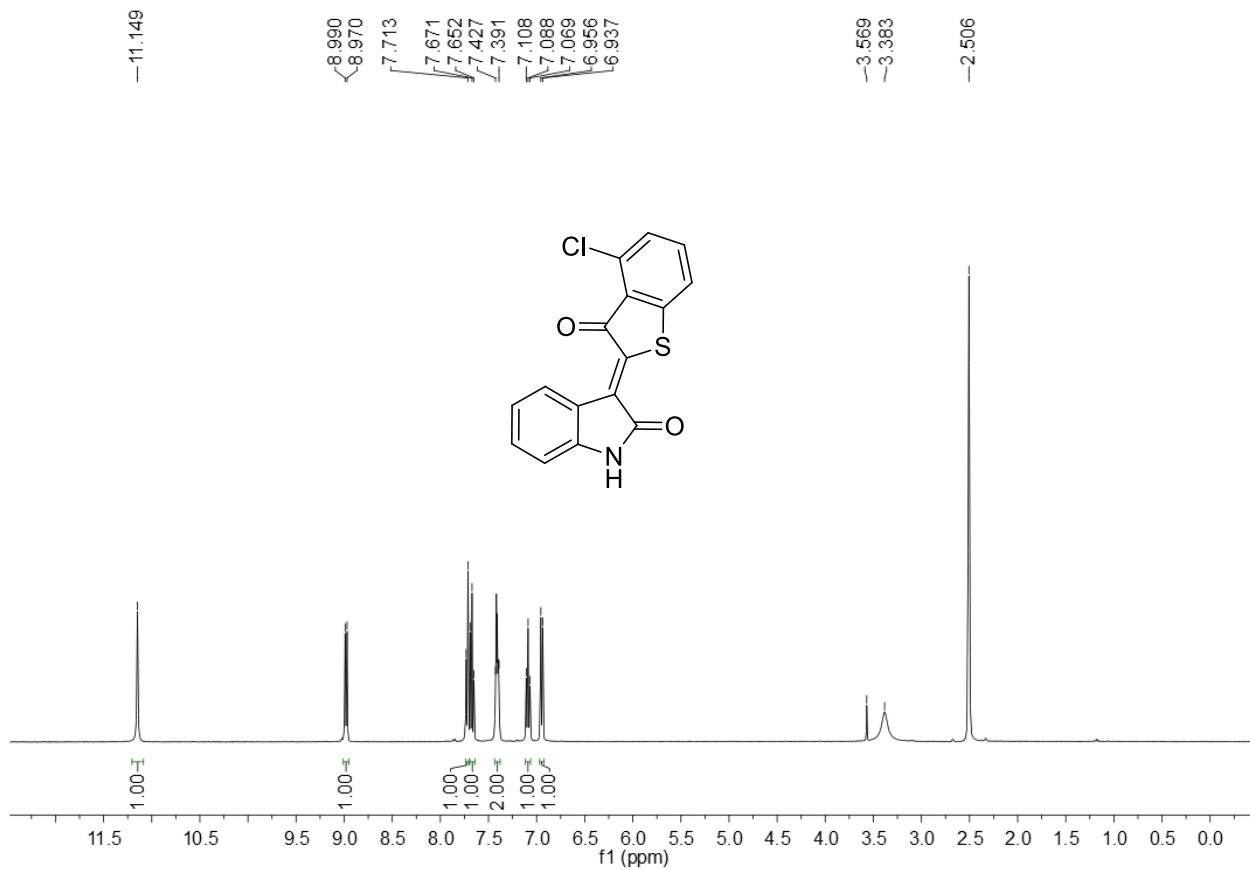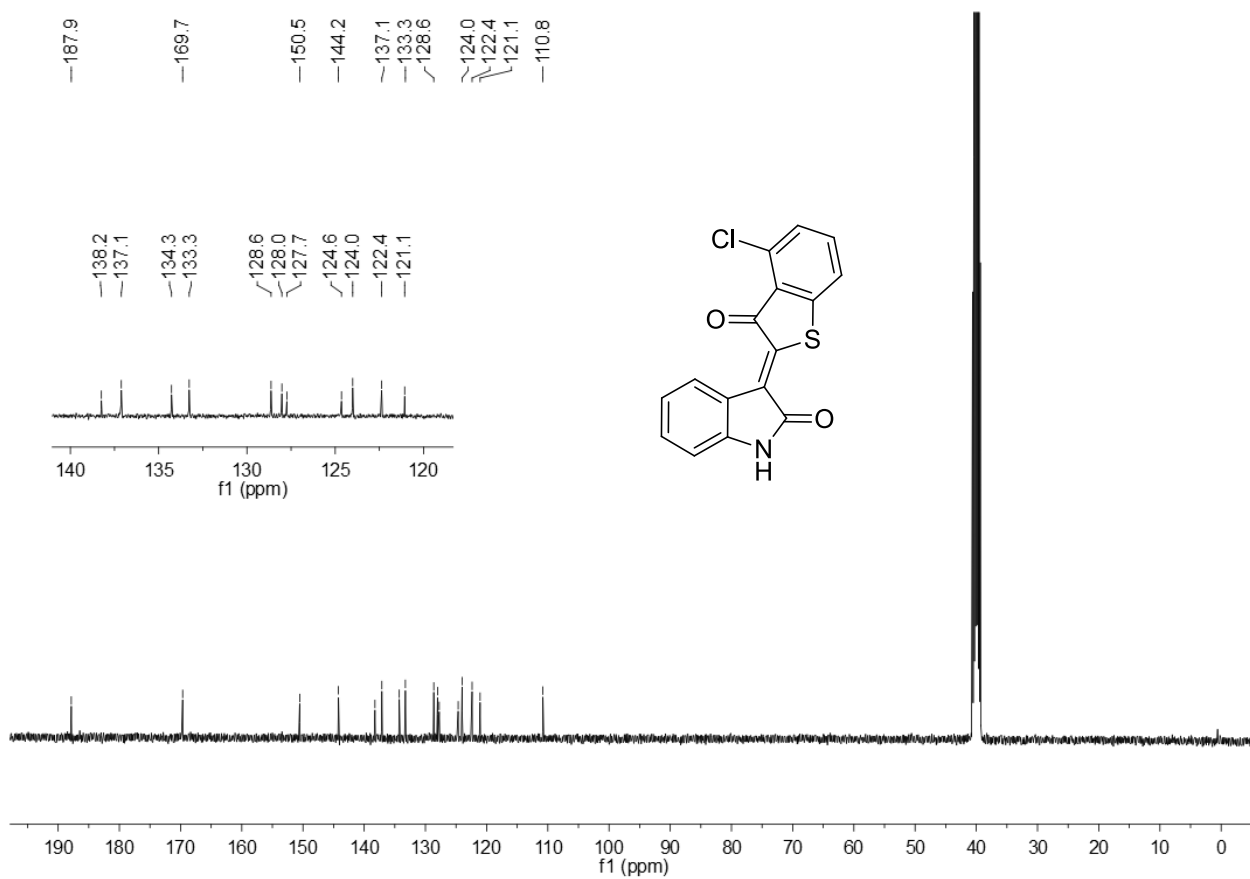

<sup>13</sup>C NMR Spectrum of Compound 2d



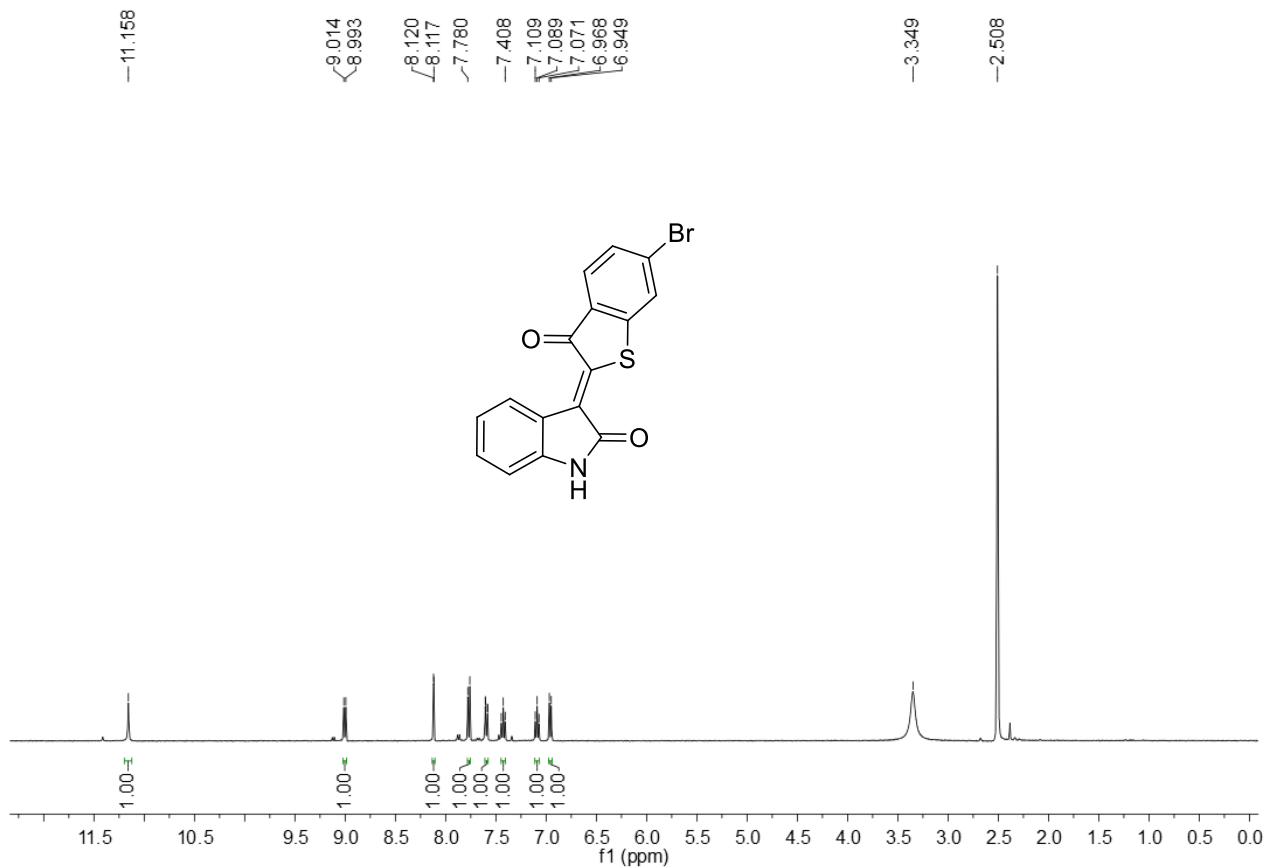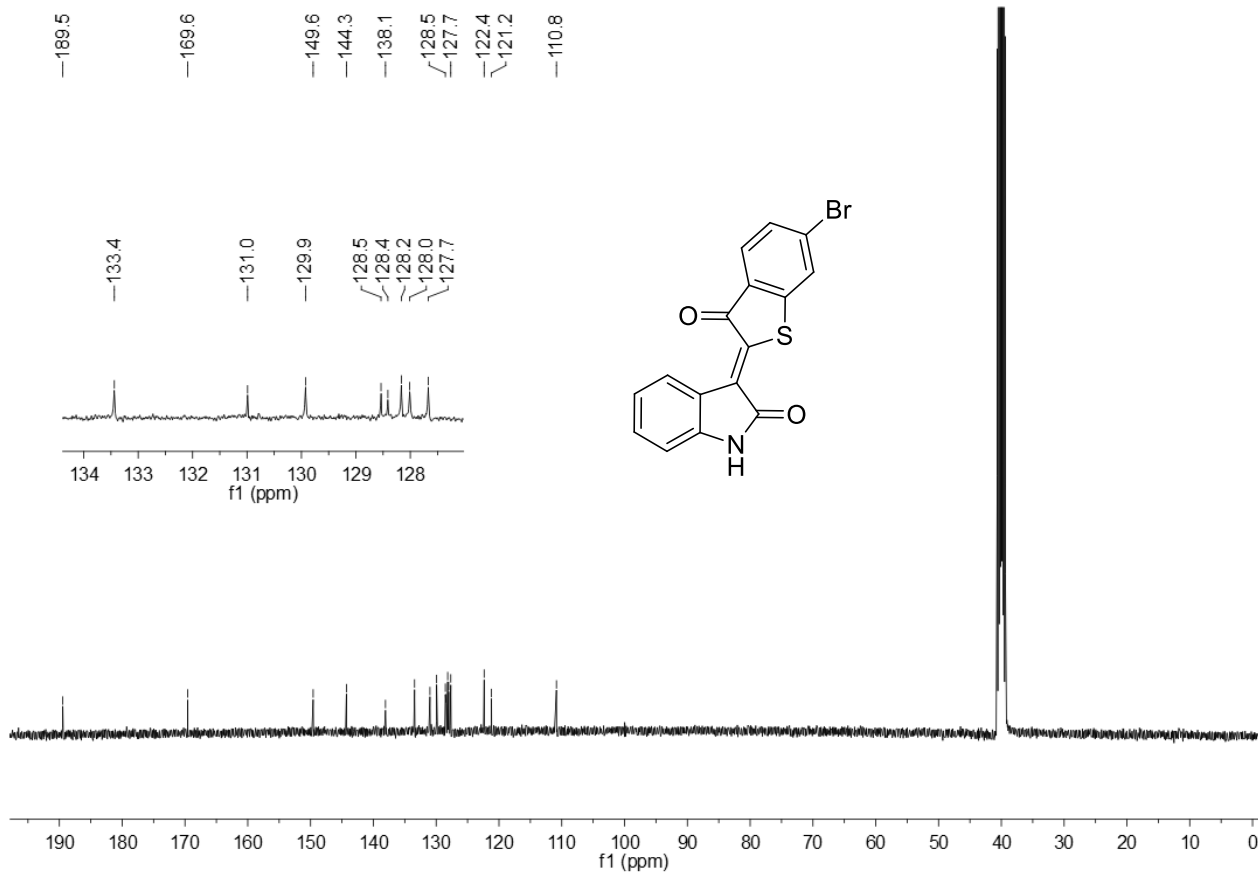

<sup>13</sup>C NMR Spectrum of Compound 2e

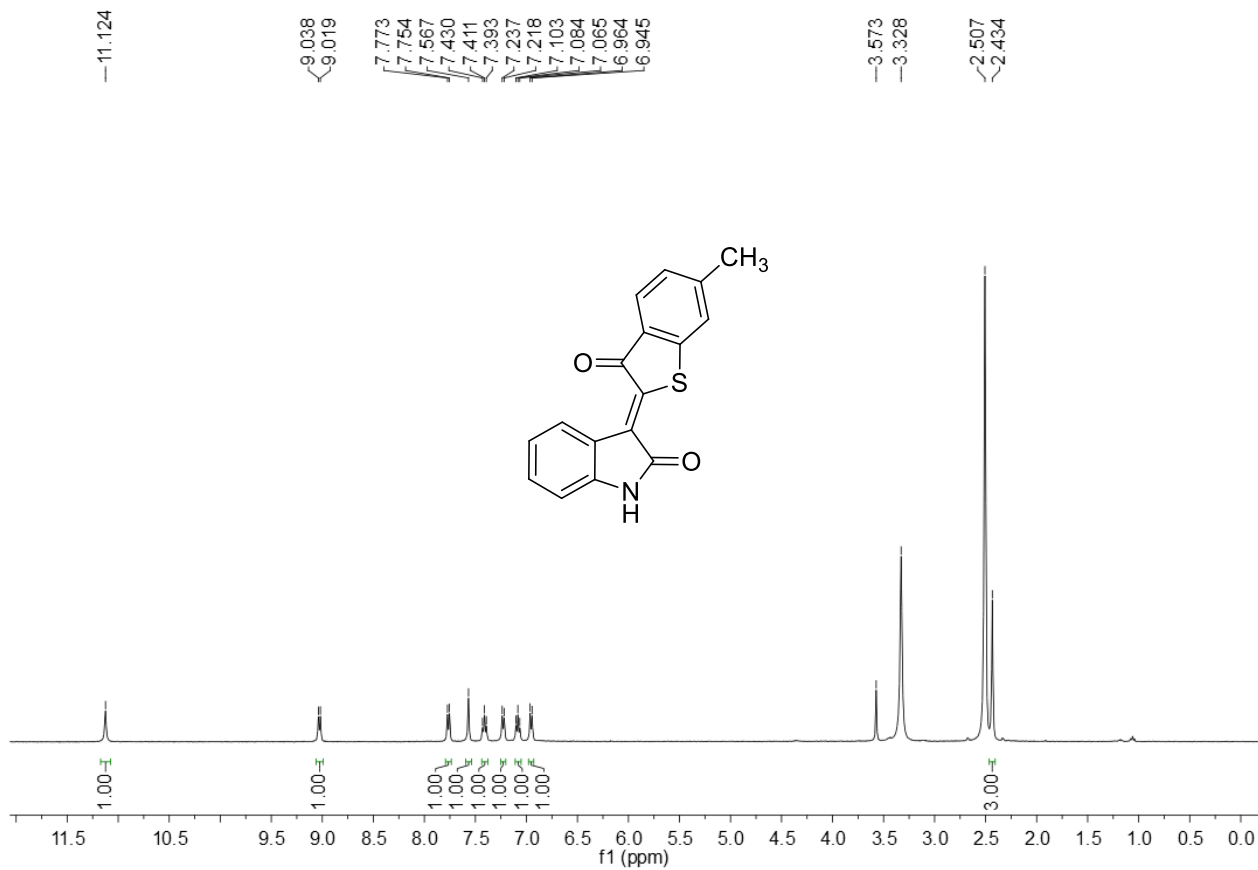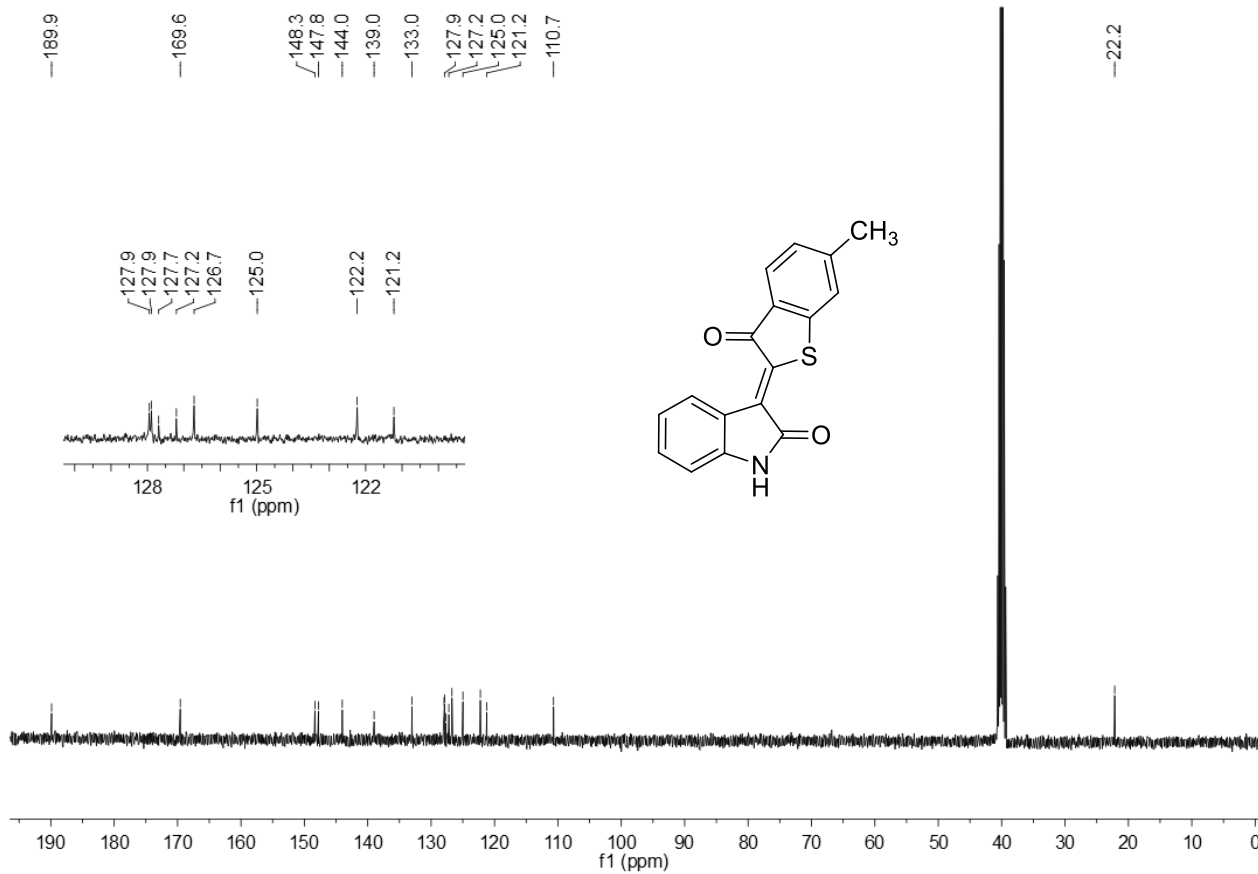

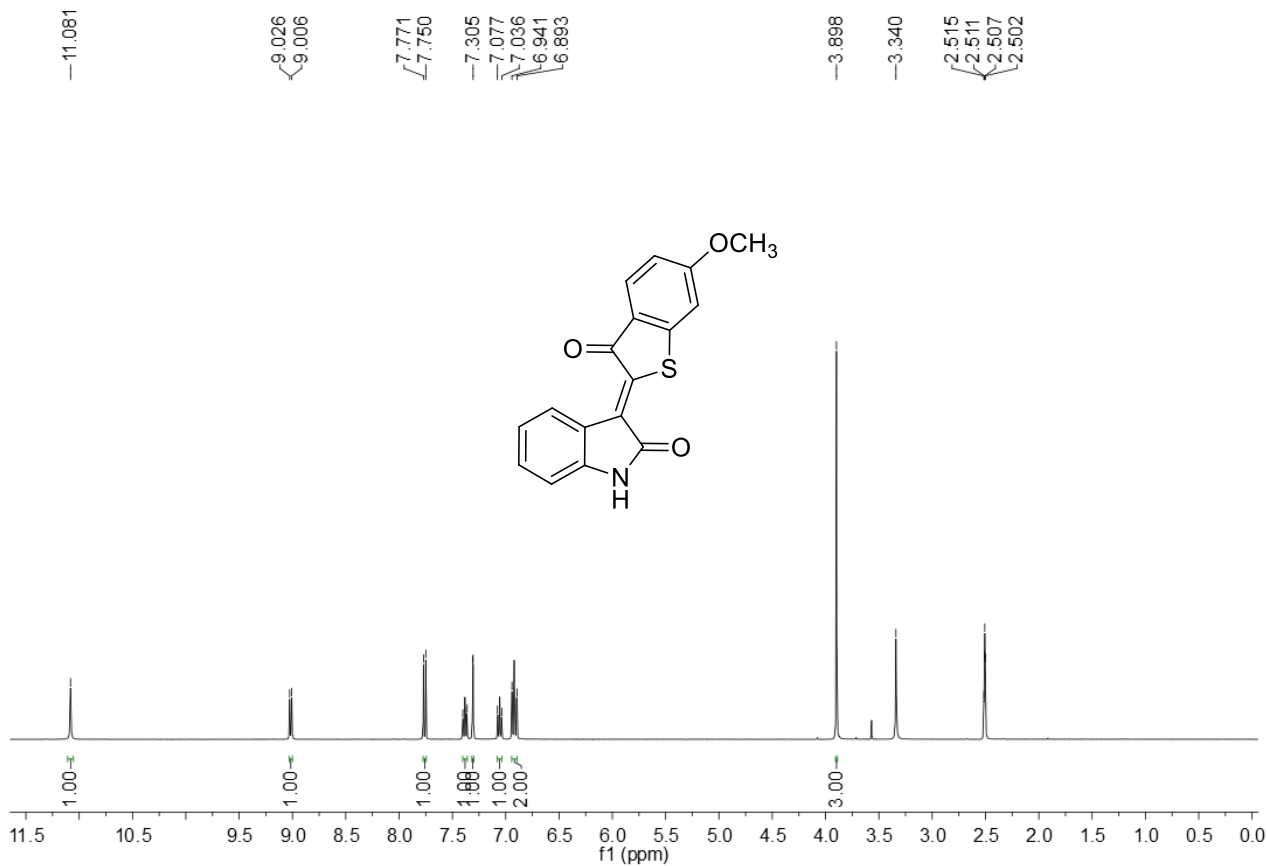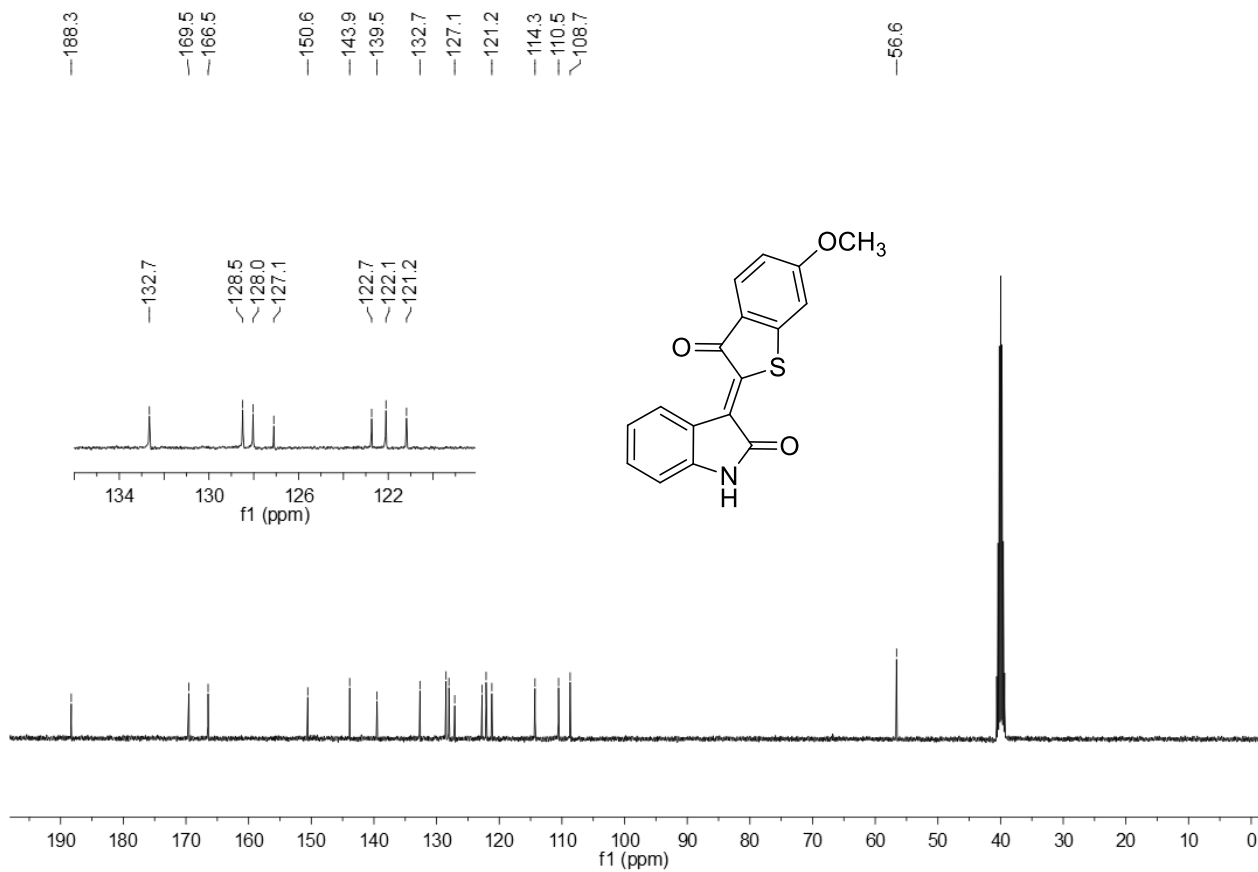

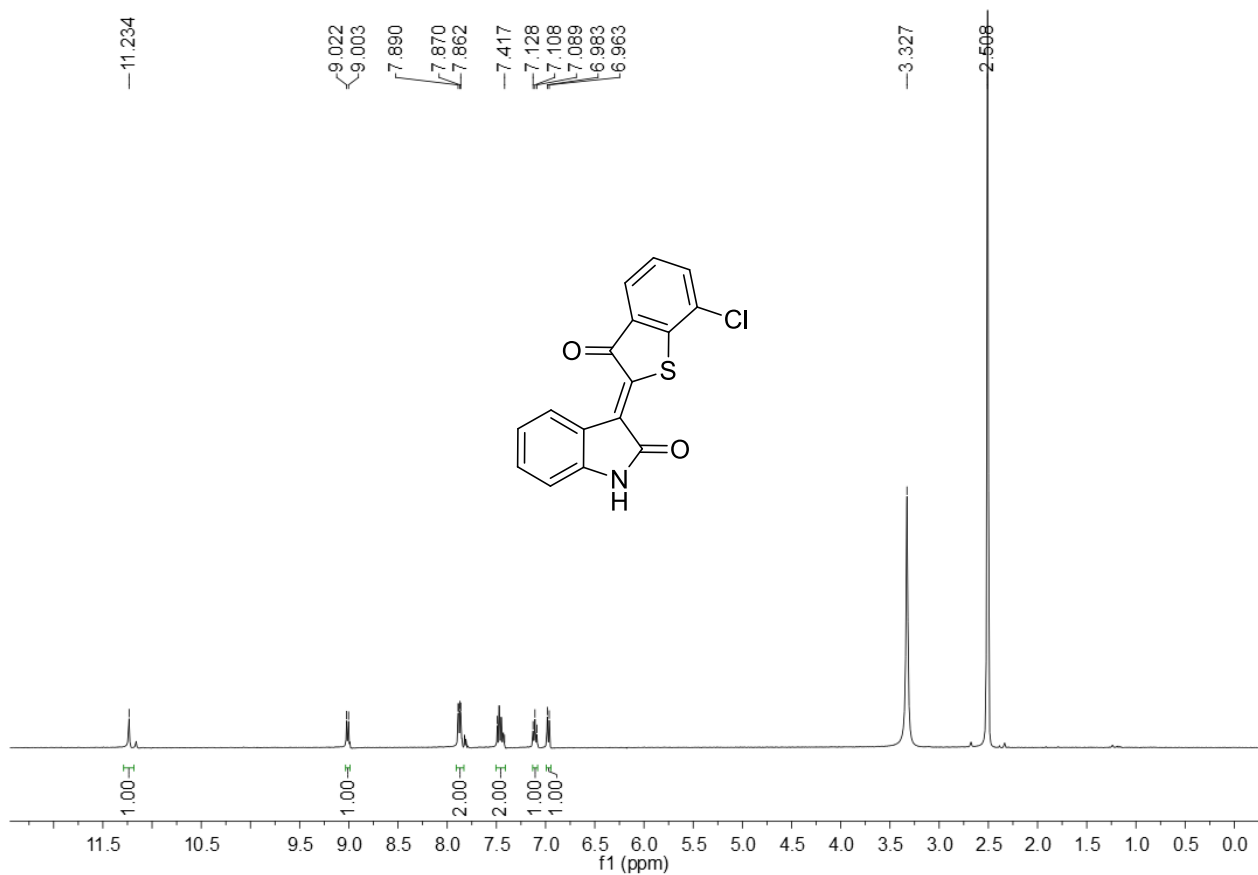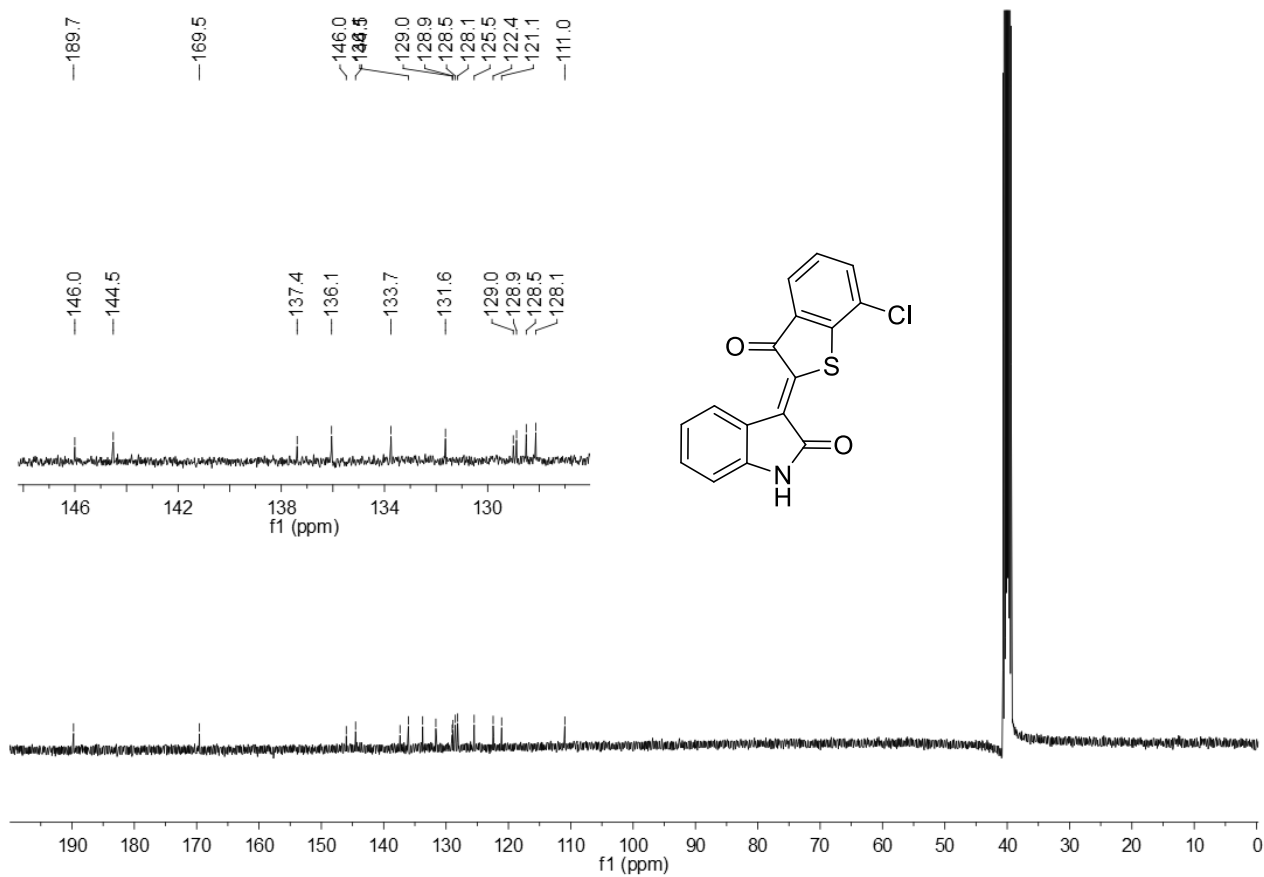

**<sup>13</sup>C NMR Spectrum of Compound 2h**

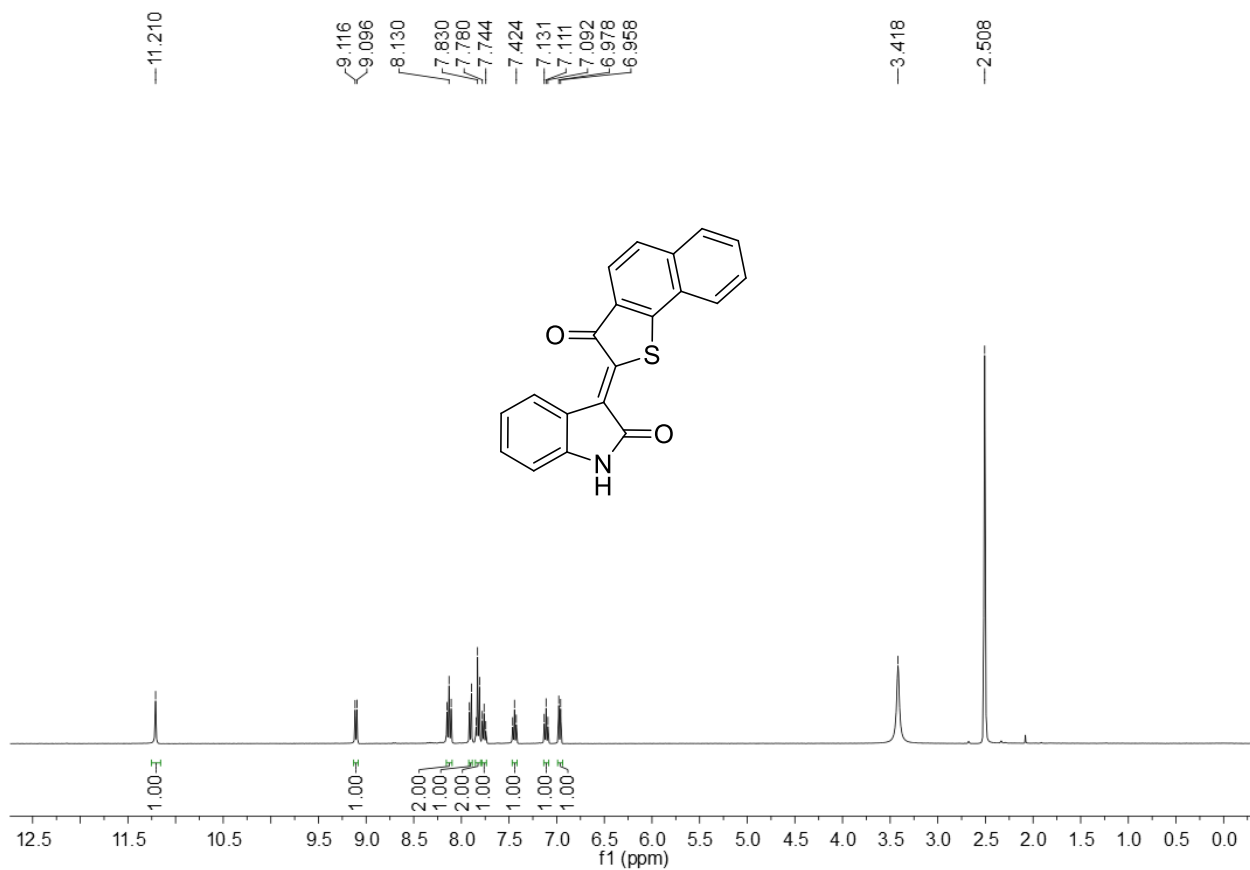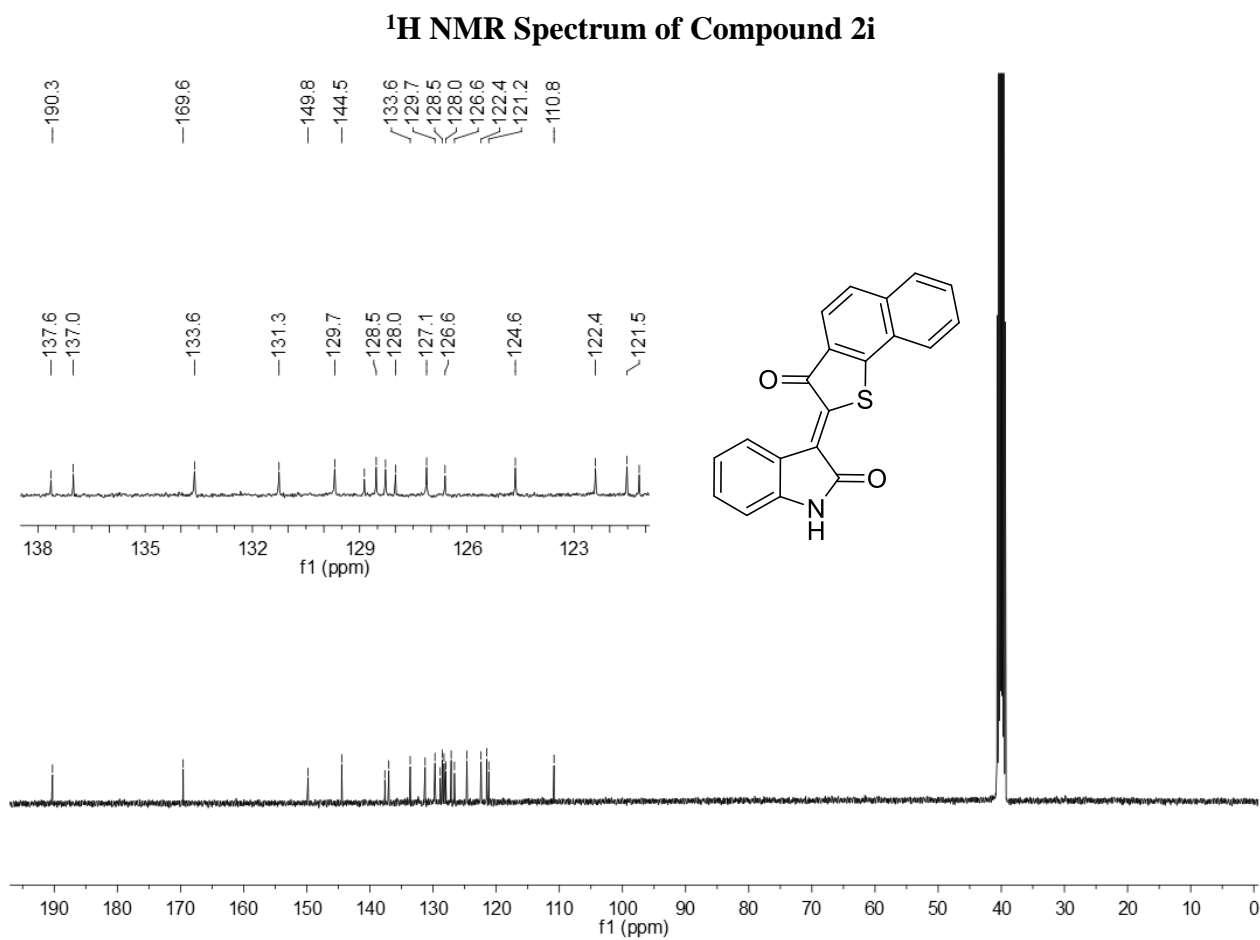

**<sup>13</sup>C NMR Spectrum of Compound 2i**

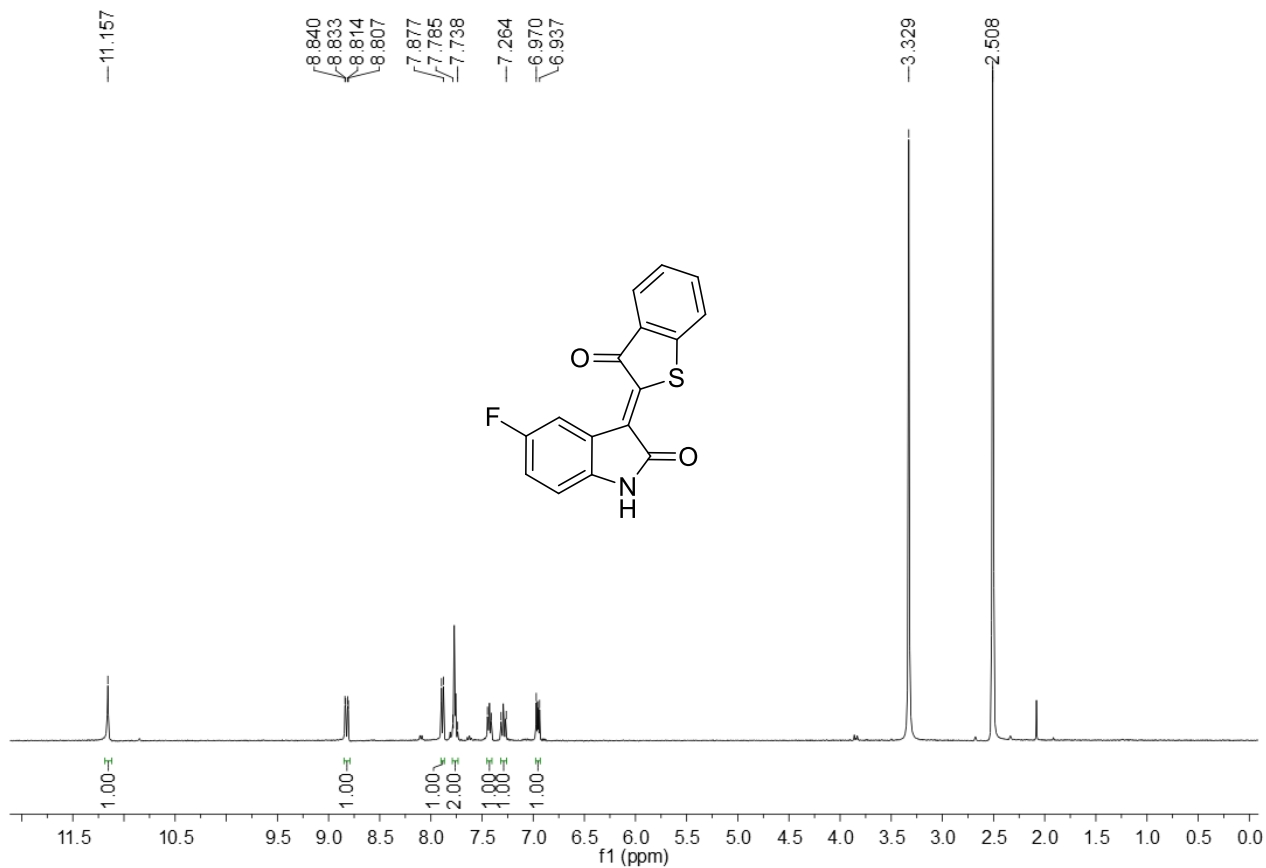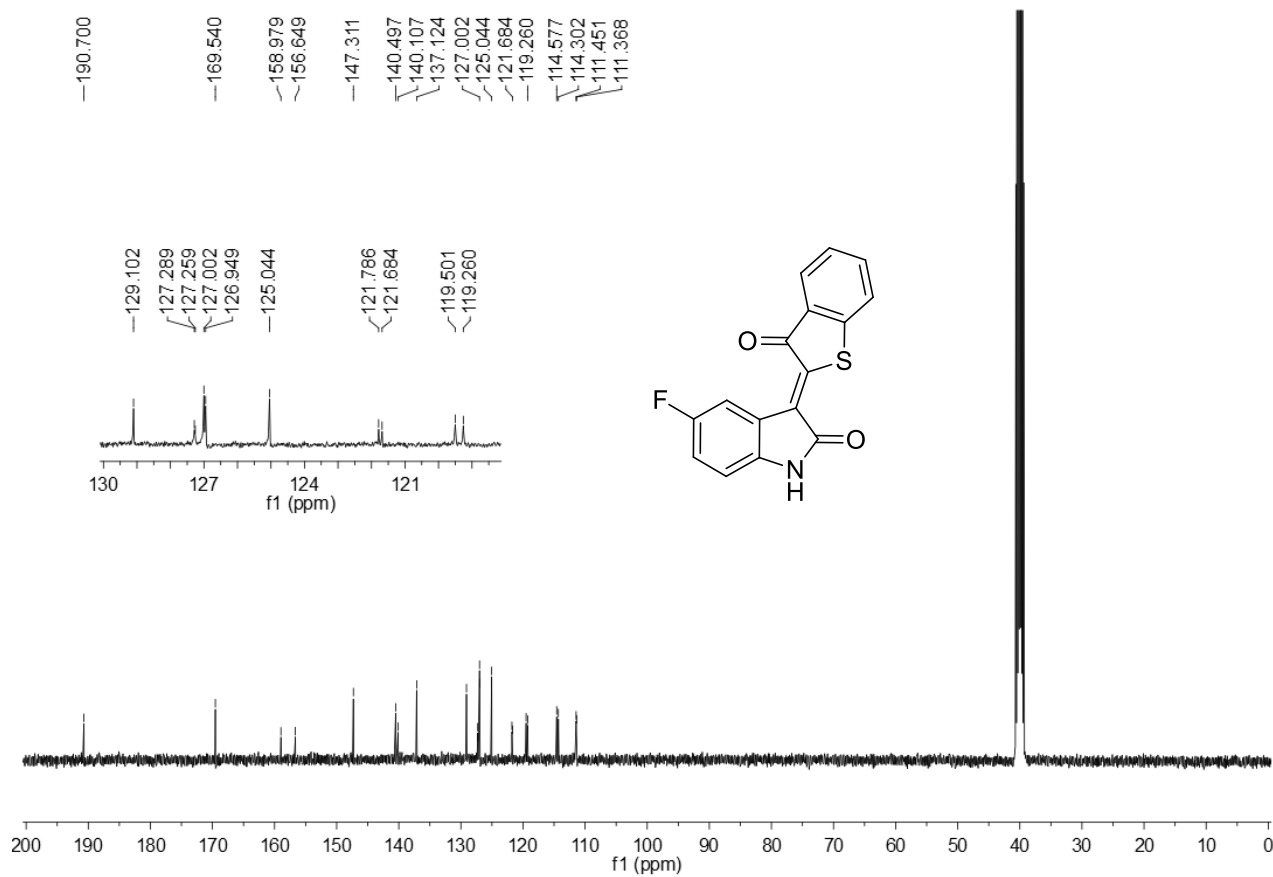

**<sup>13</sup>C NMR Spectrum of Compound 2j**

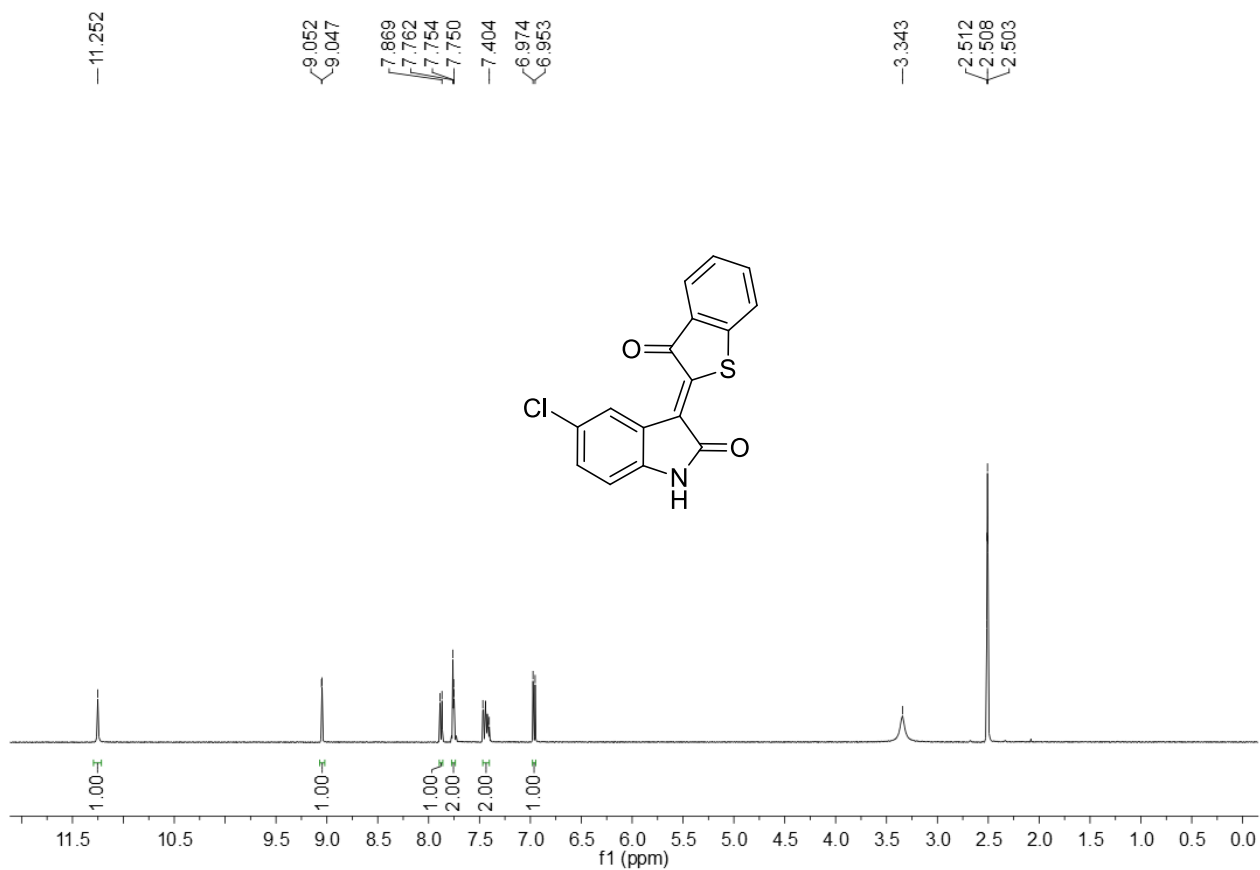

<sup>1</sup>H NMR Spectrum of Compound 2k

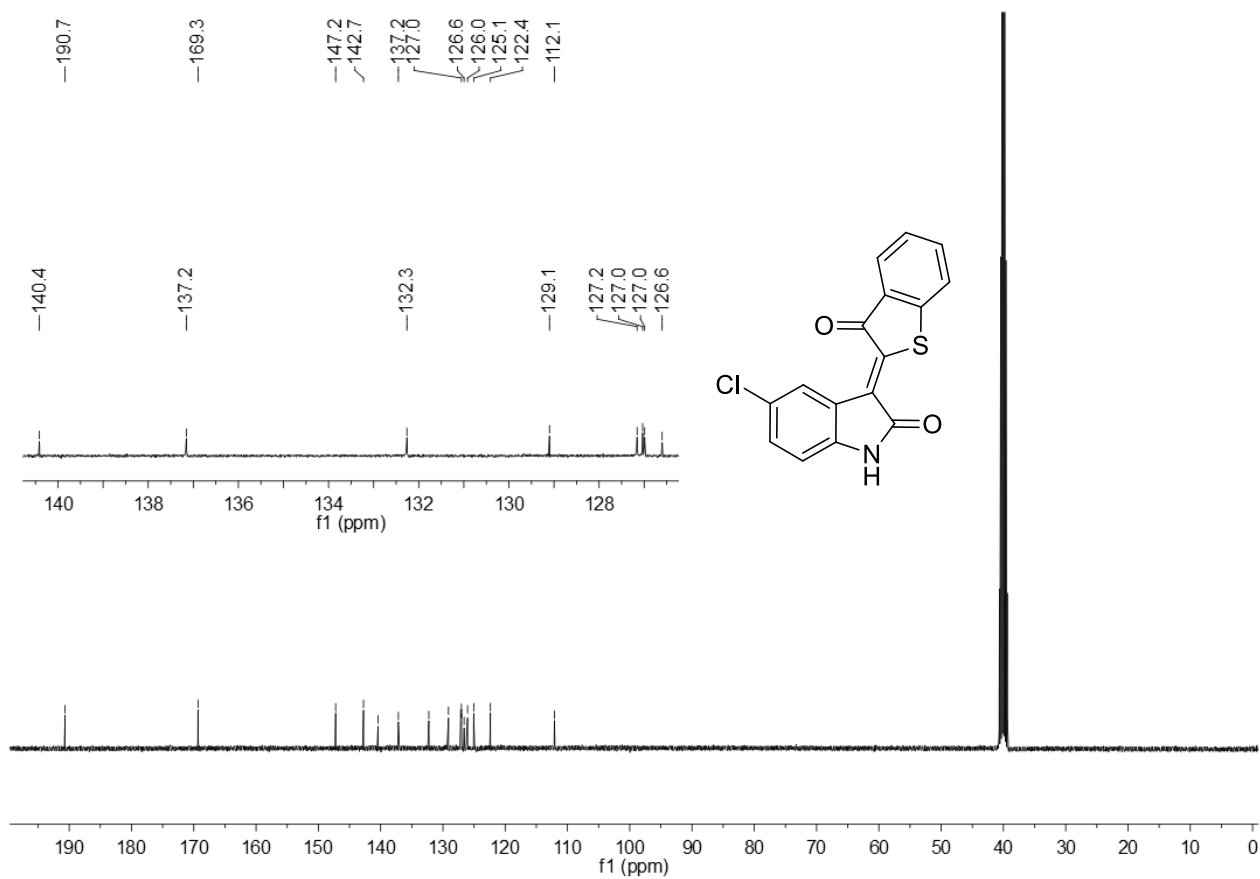

<sup>13</sup>C NMR Spectrum of Compound 2k

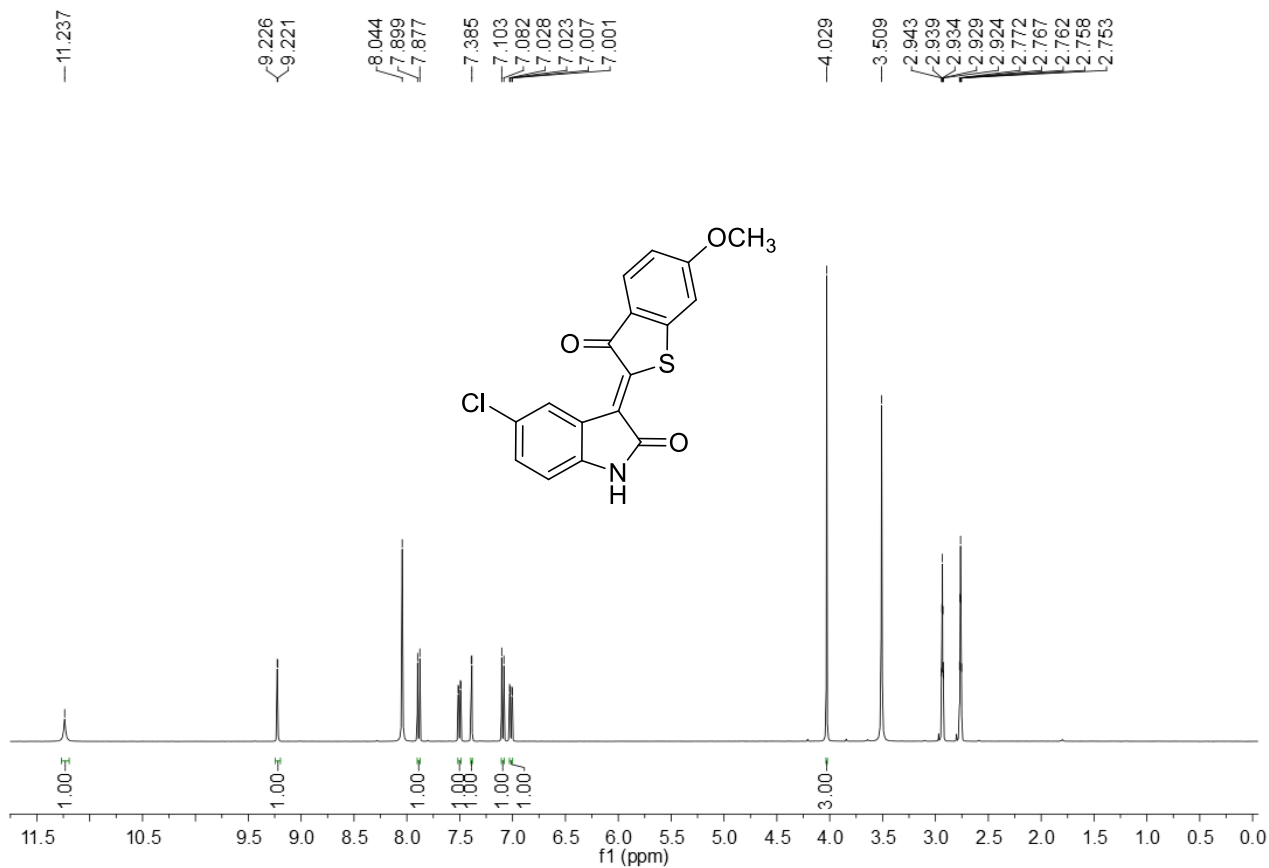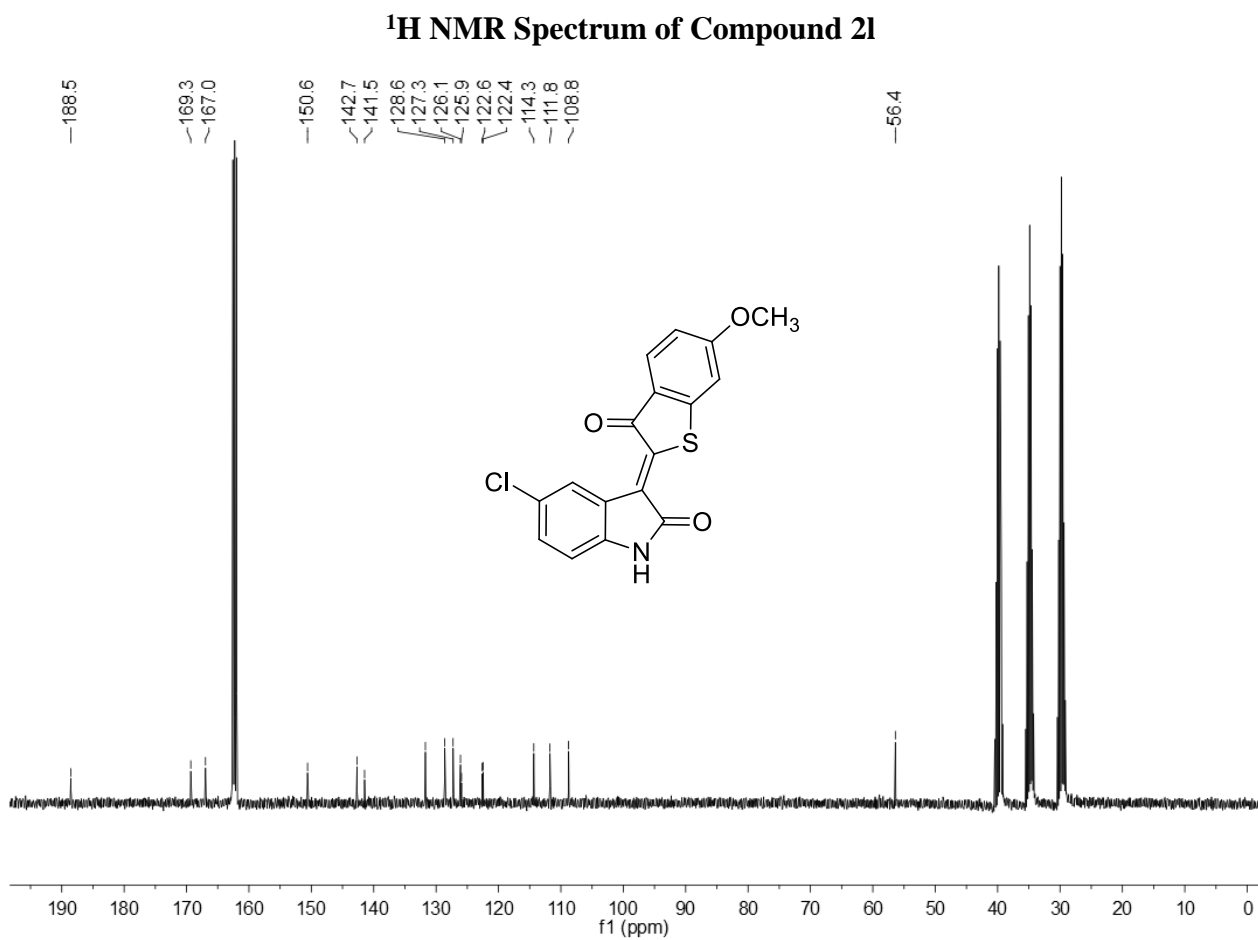



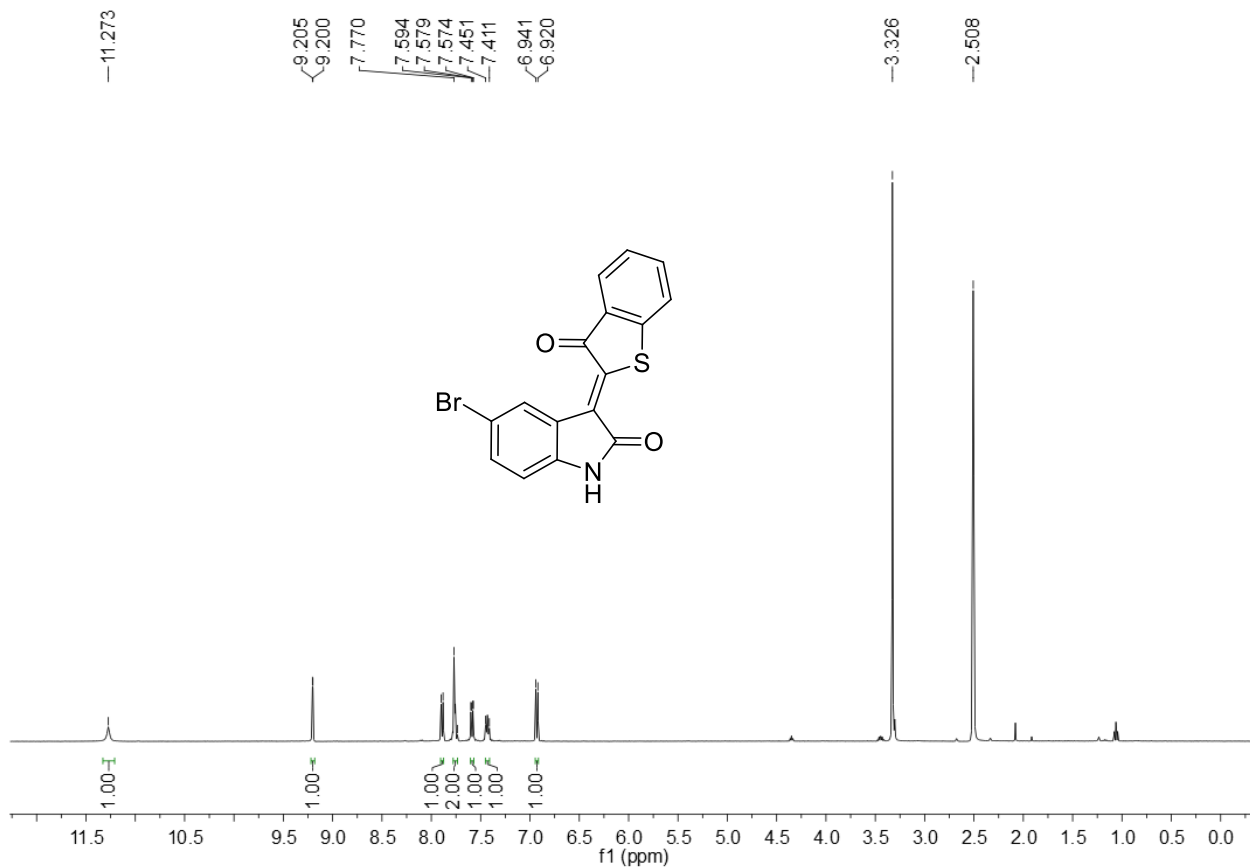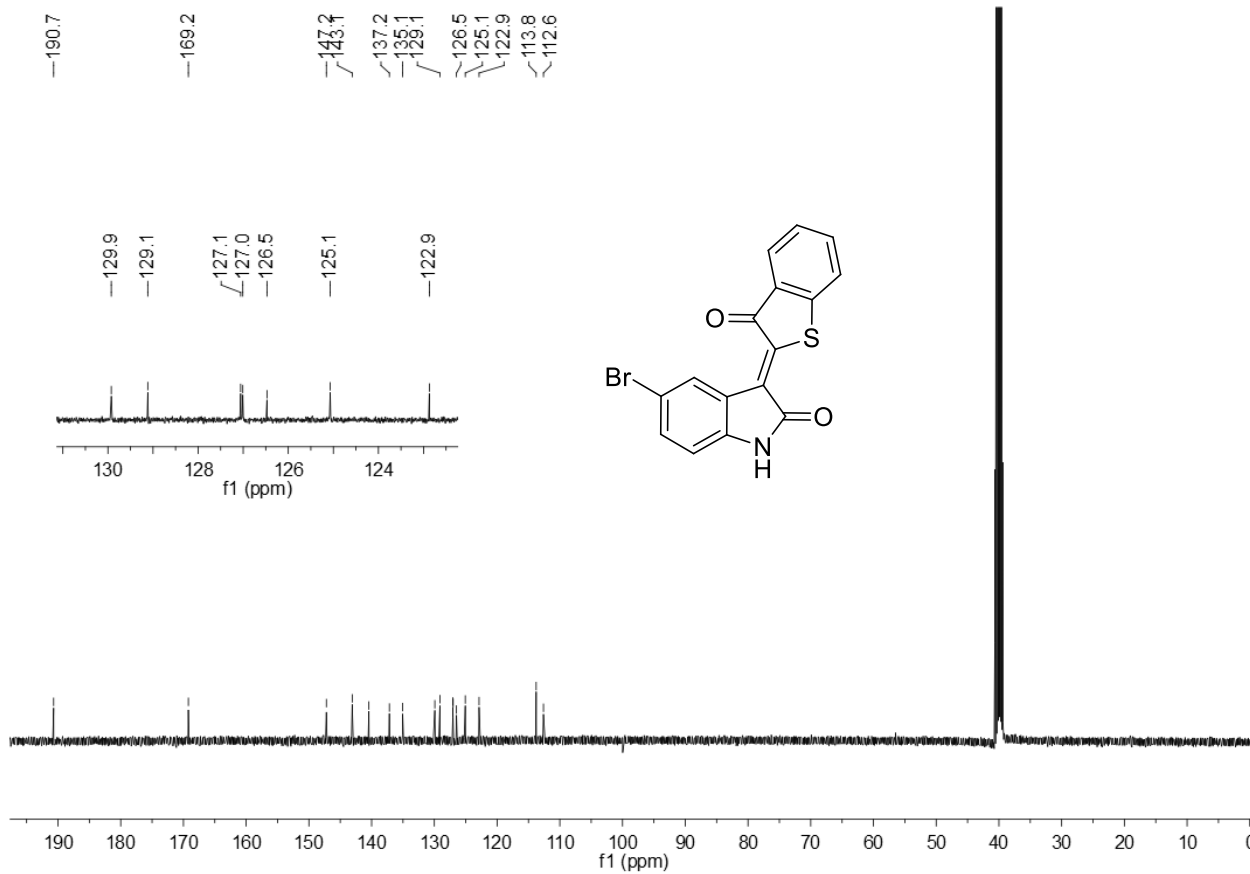

**<sup>13</sup>C NMR Spectrum of Compound 2m**

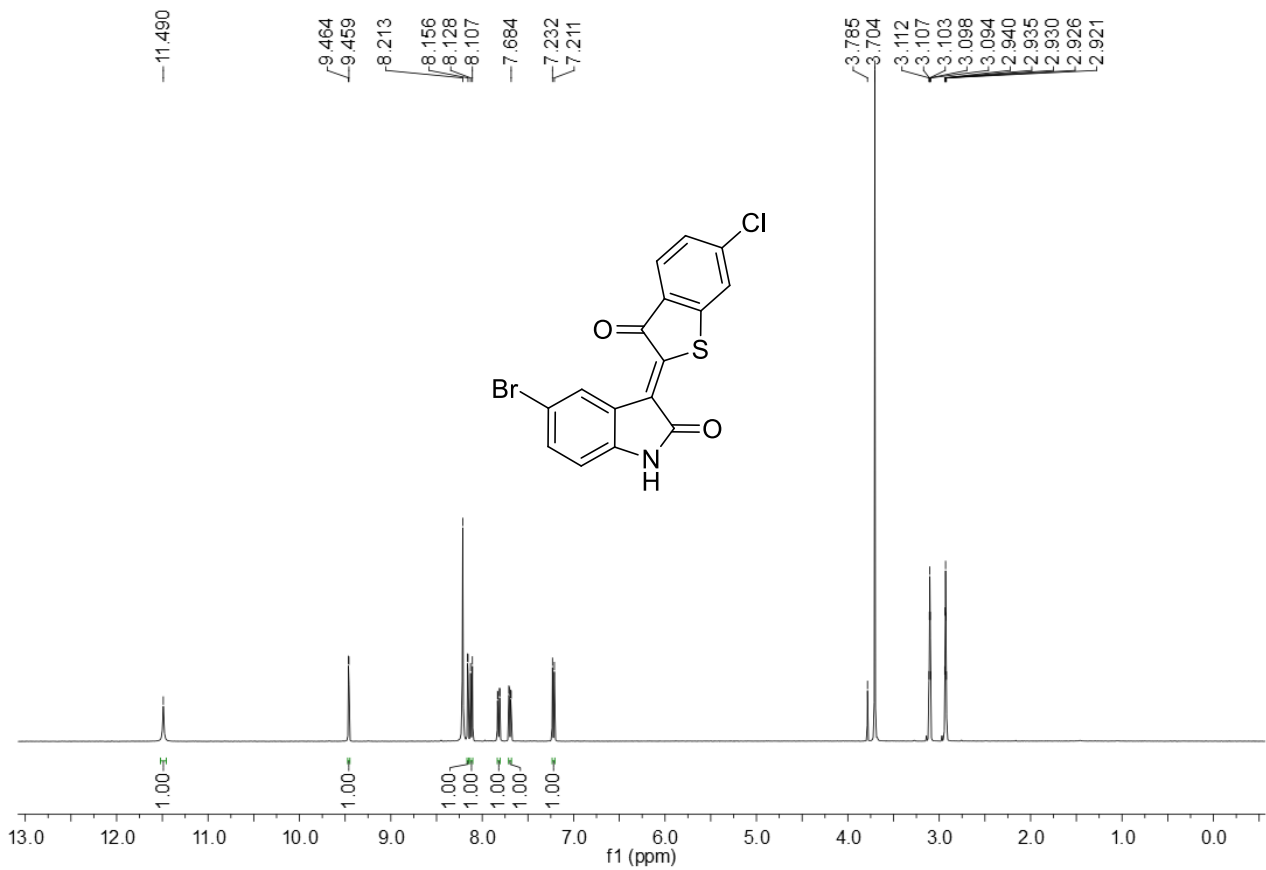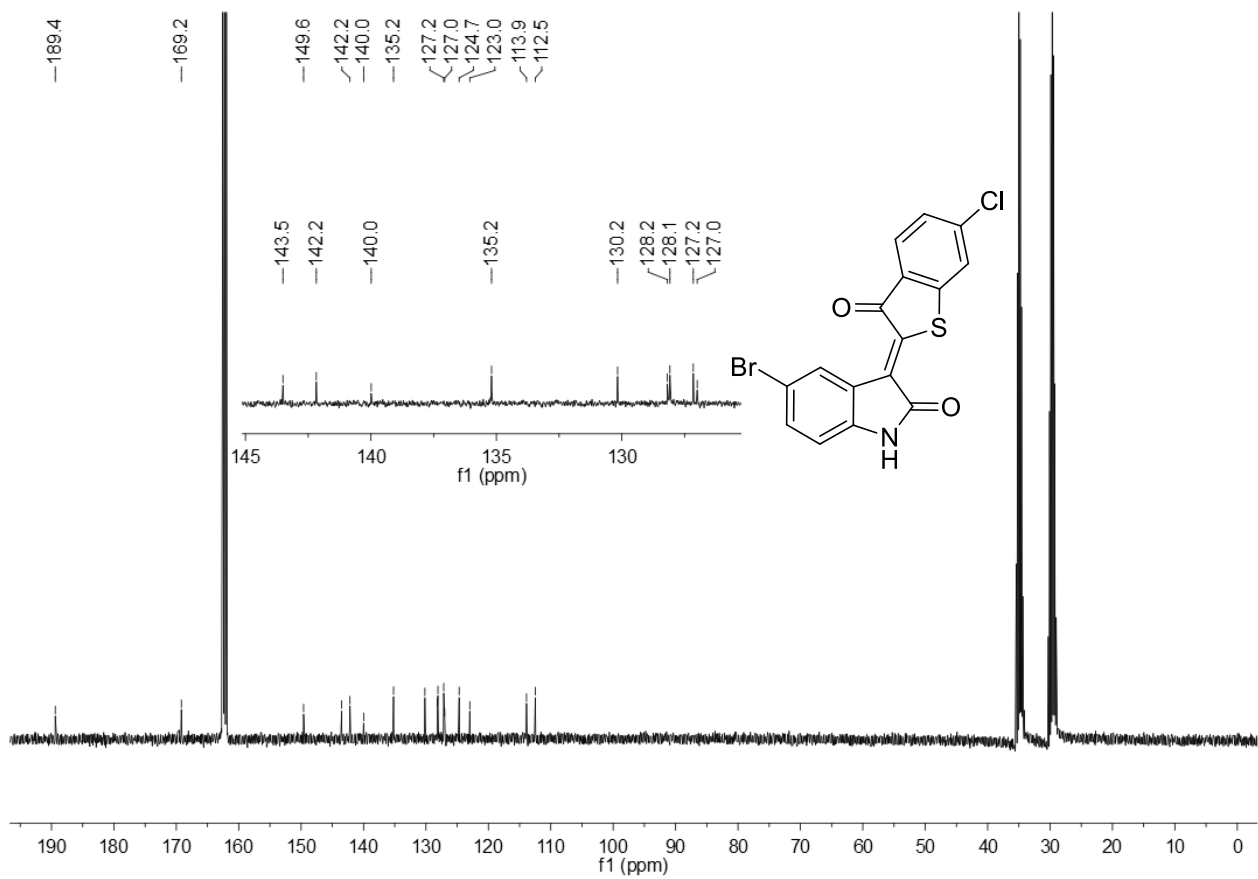

**<sup>13</sup>C NMR Spectrum of Compound 2n**

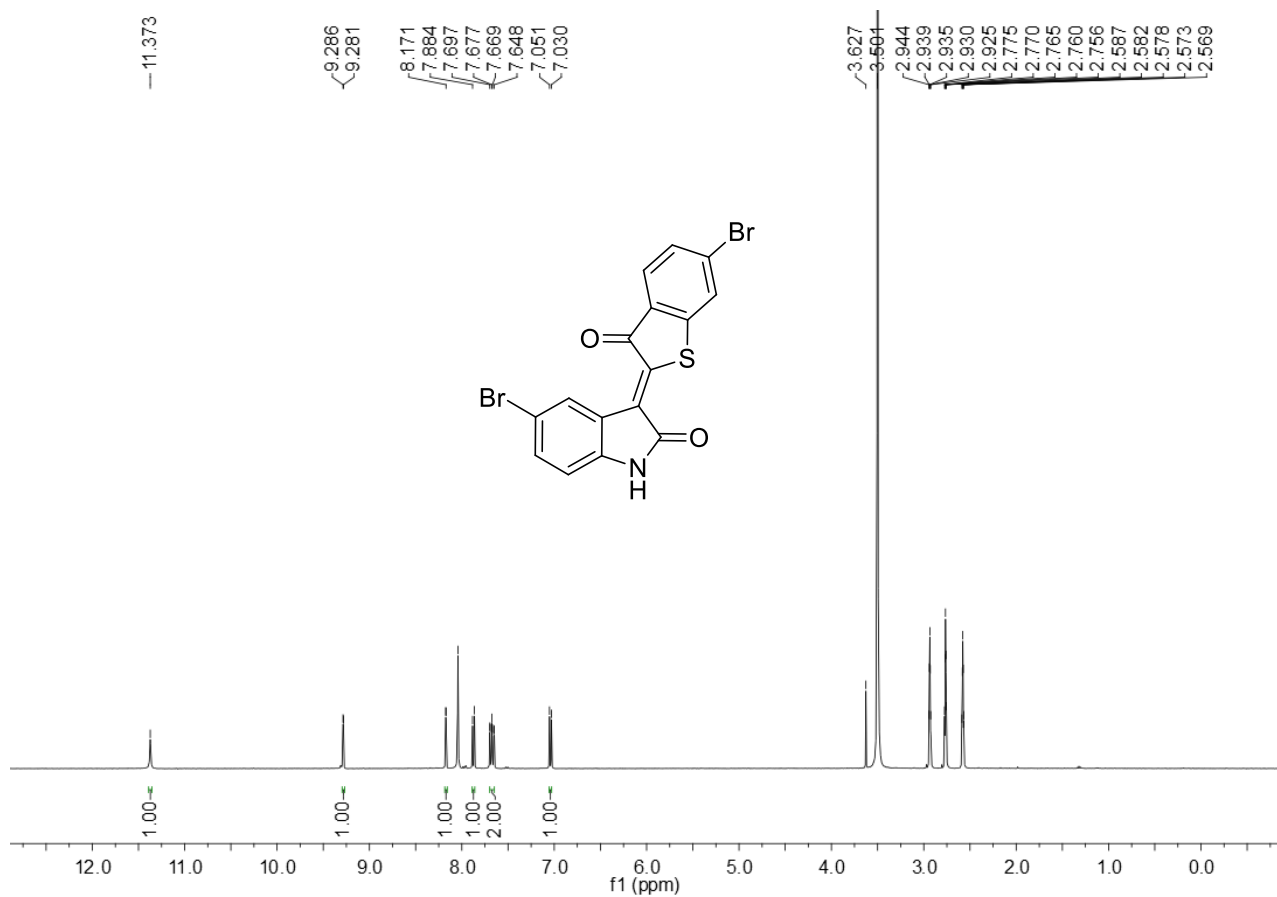

**<sup>1</sup>H NMR Spectrum of Compound 2o**

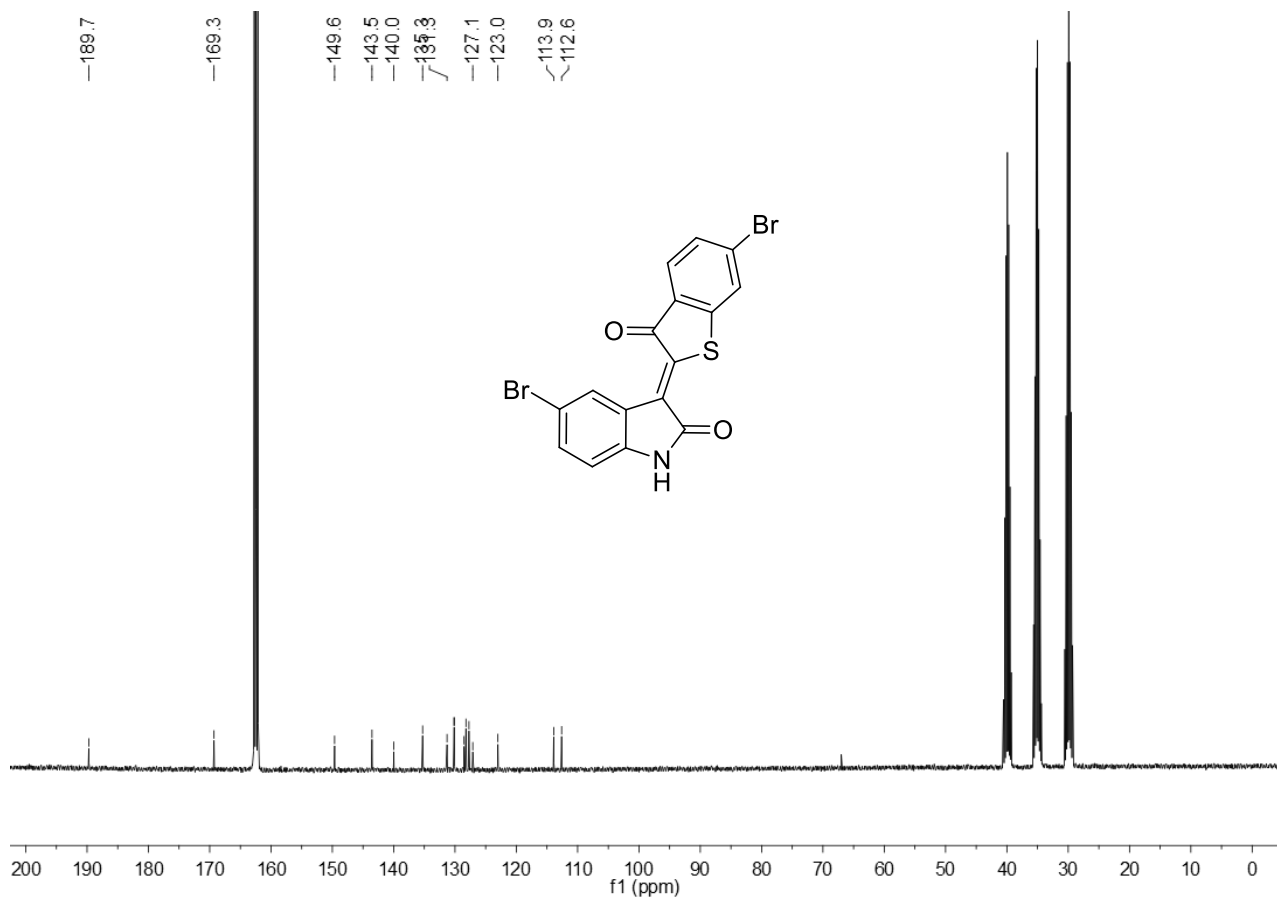

**<sup>13</sup>C NMR Spectrum of Compound 2o**

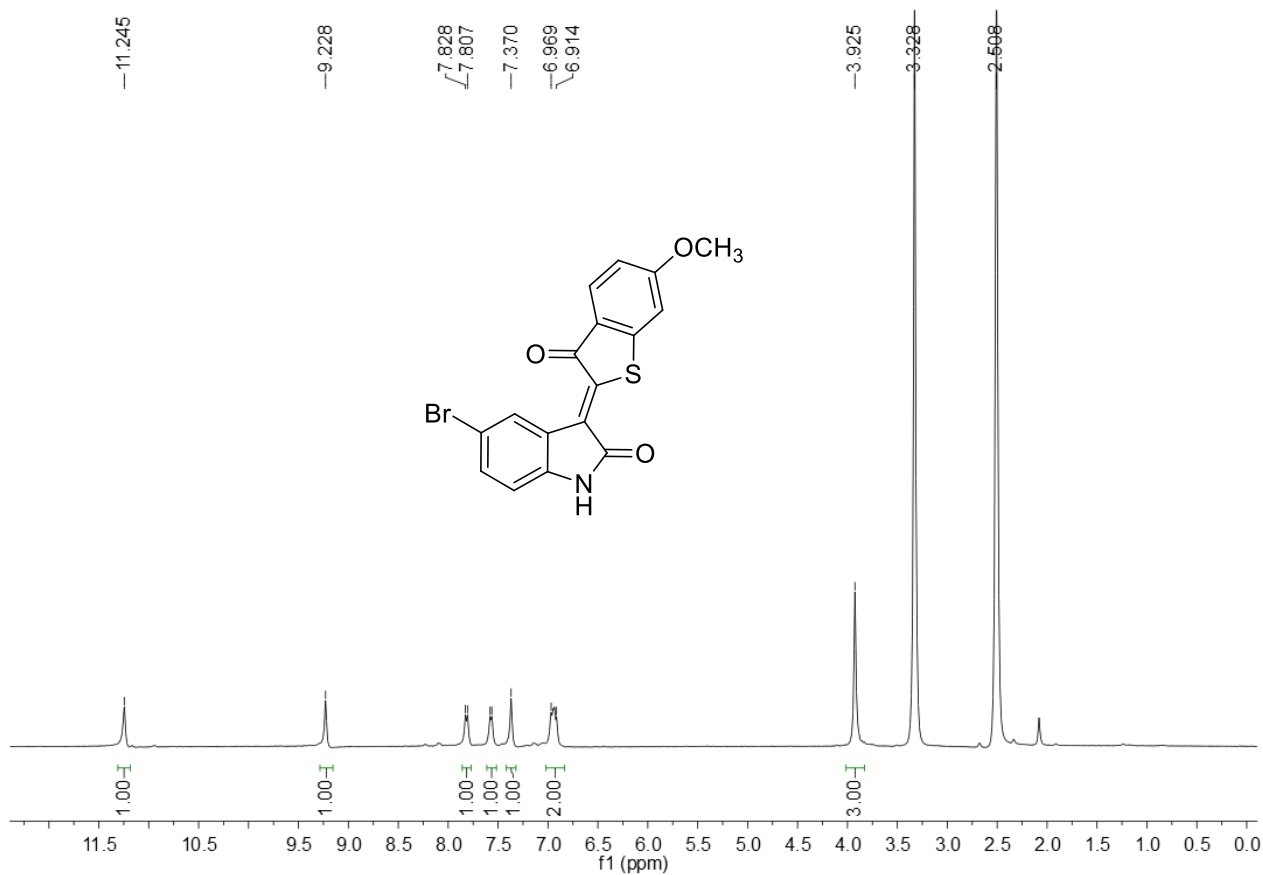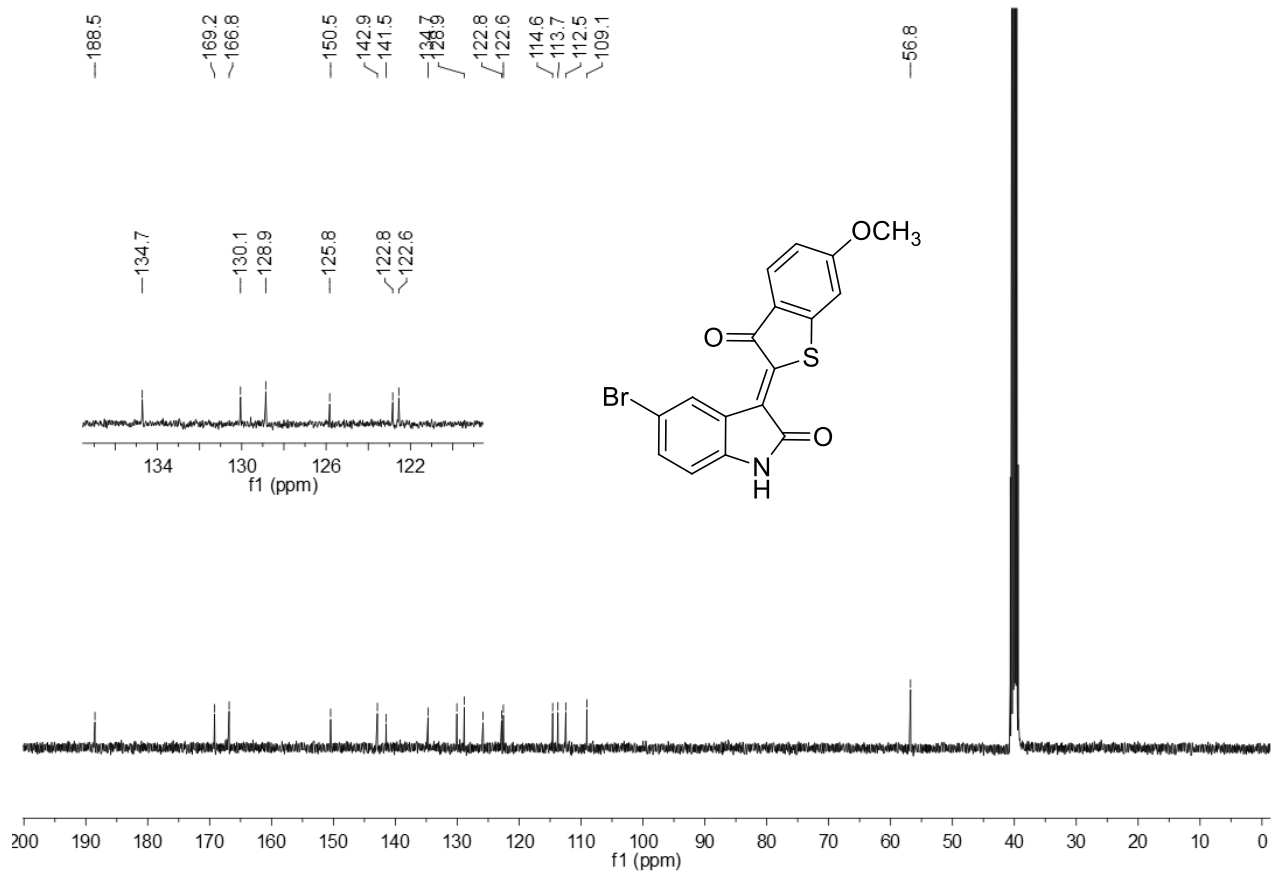

**<sup>13</sup>C NMR Spectrum of Compound 2p**

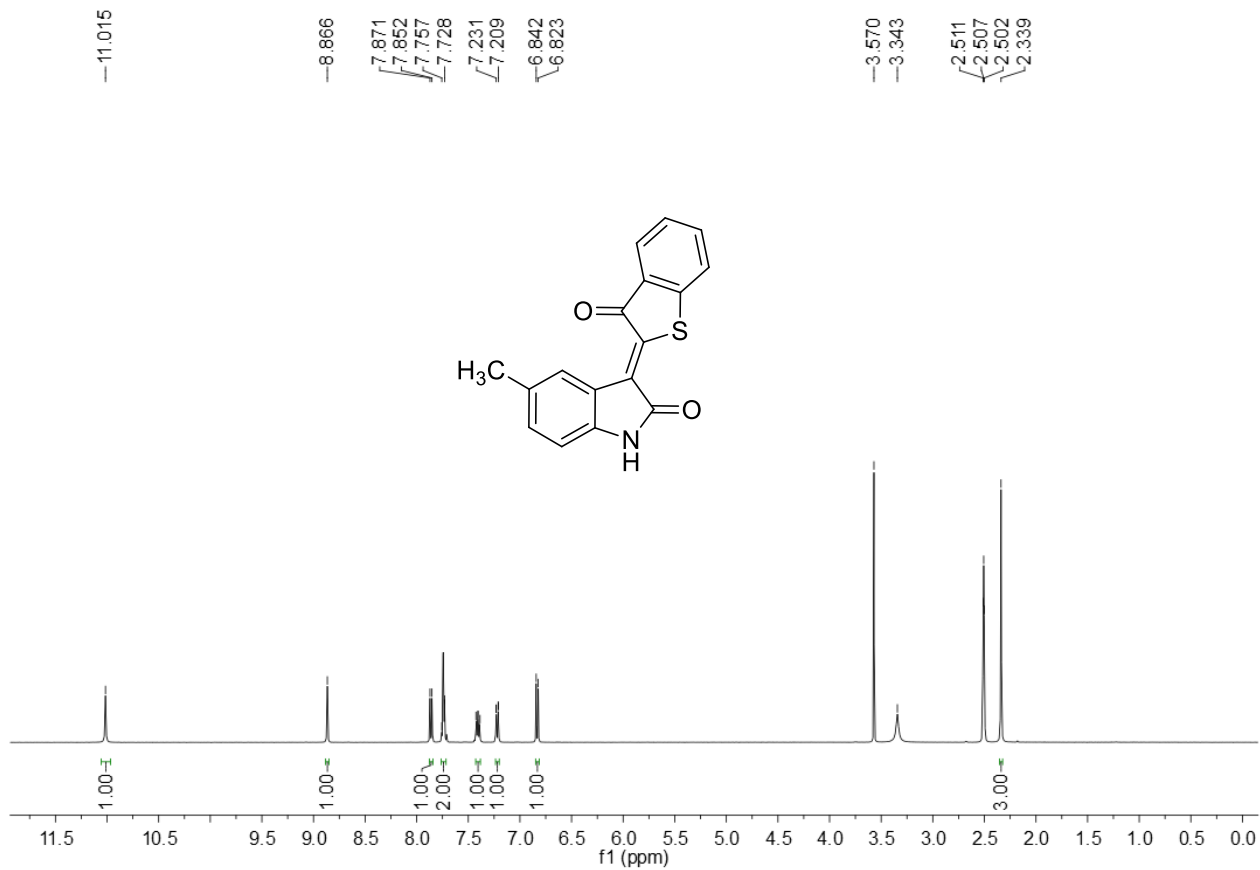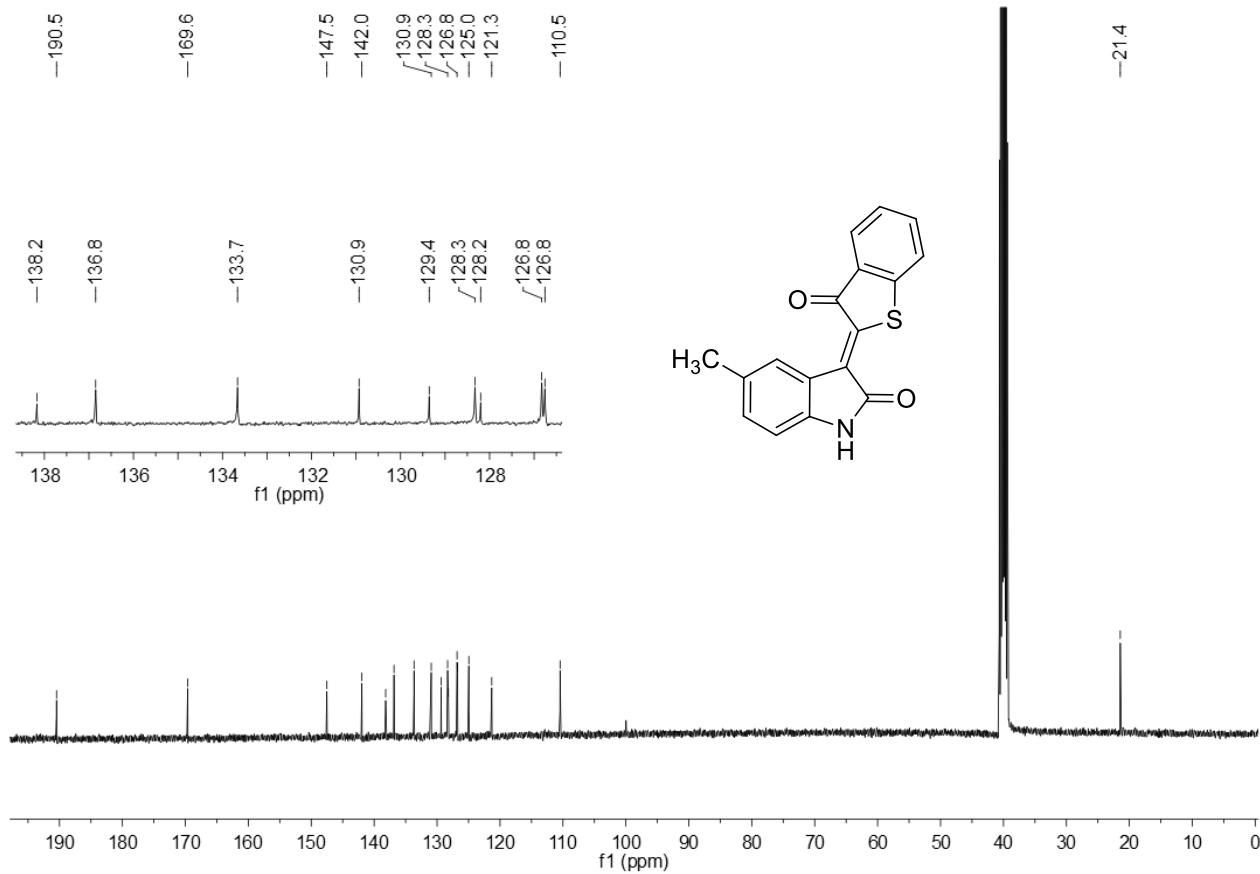

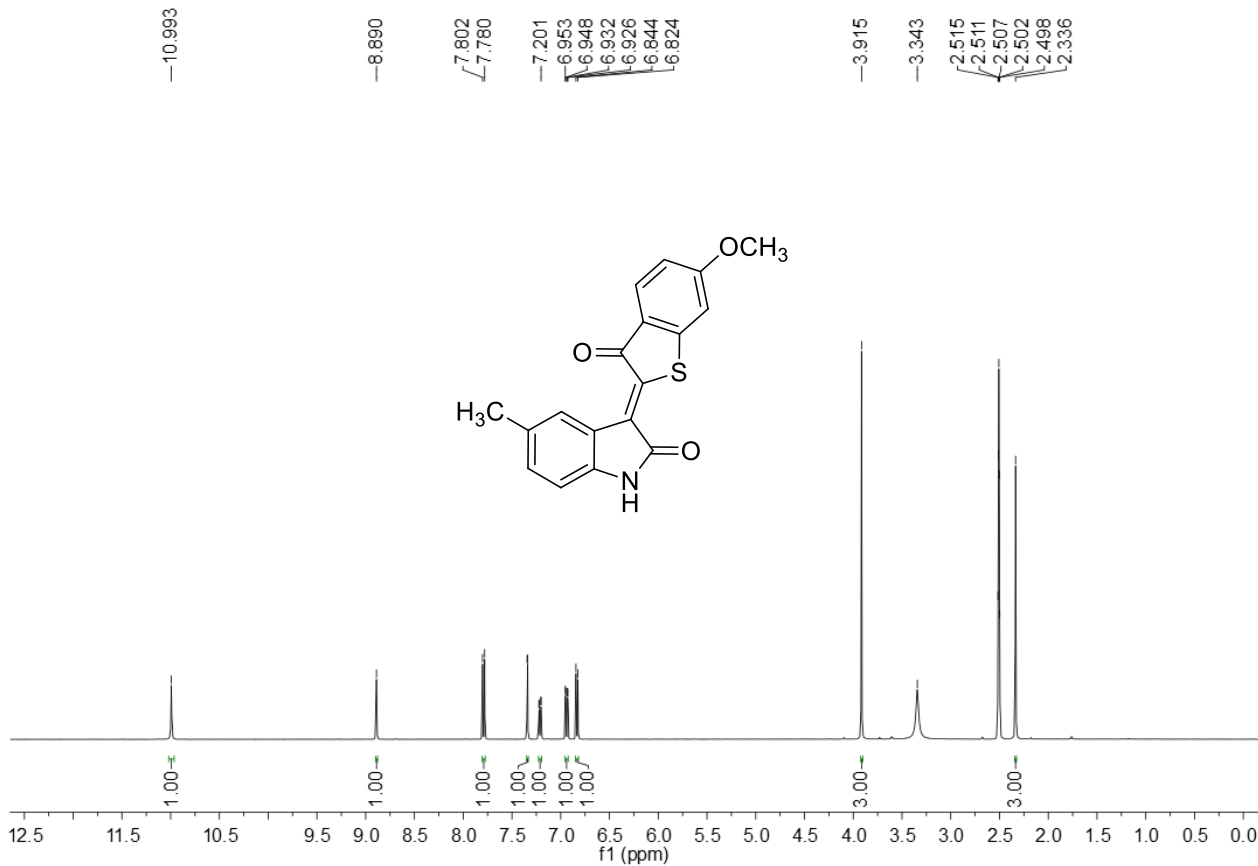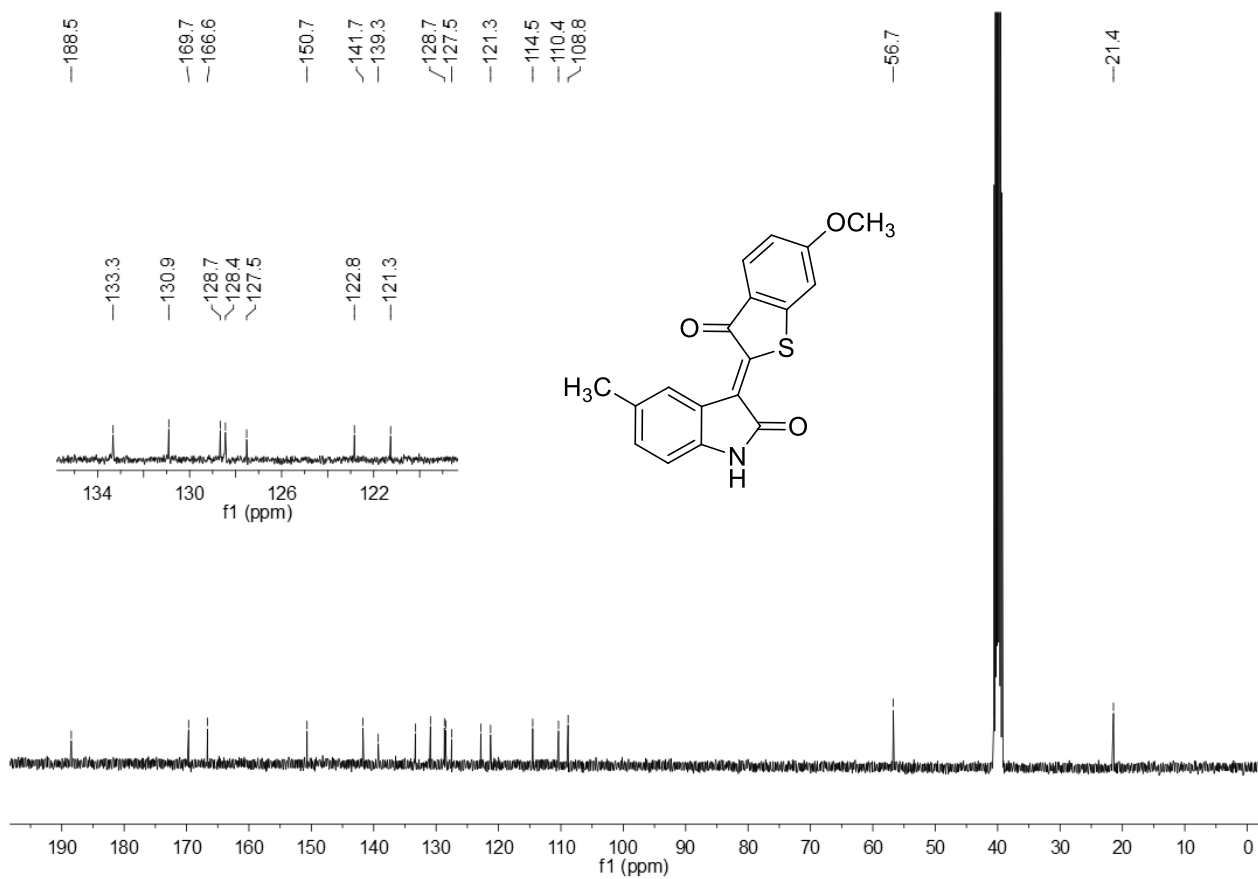

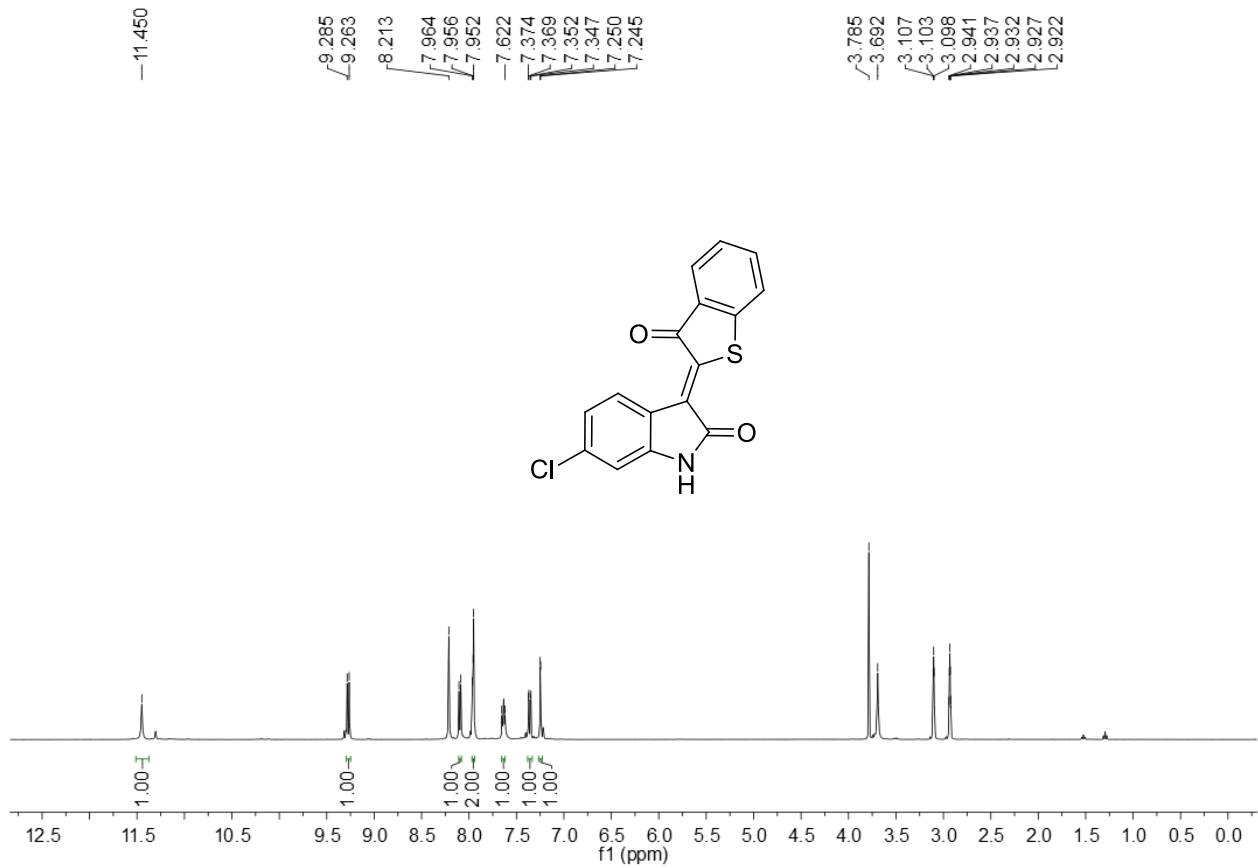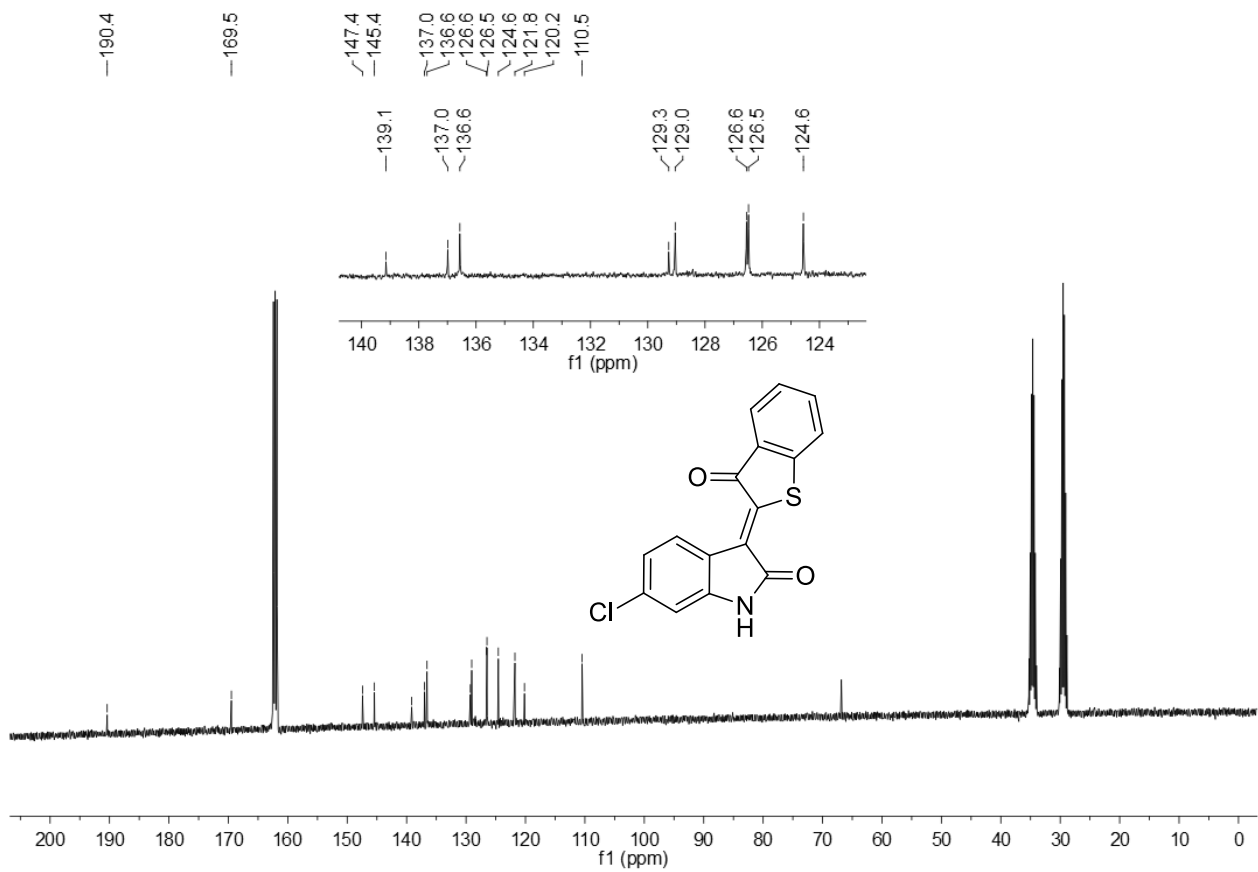

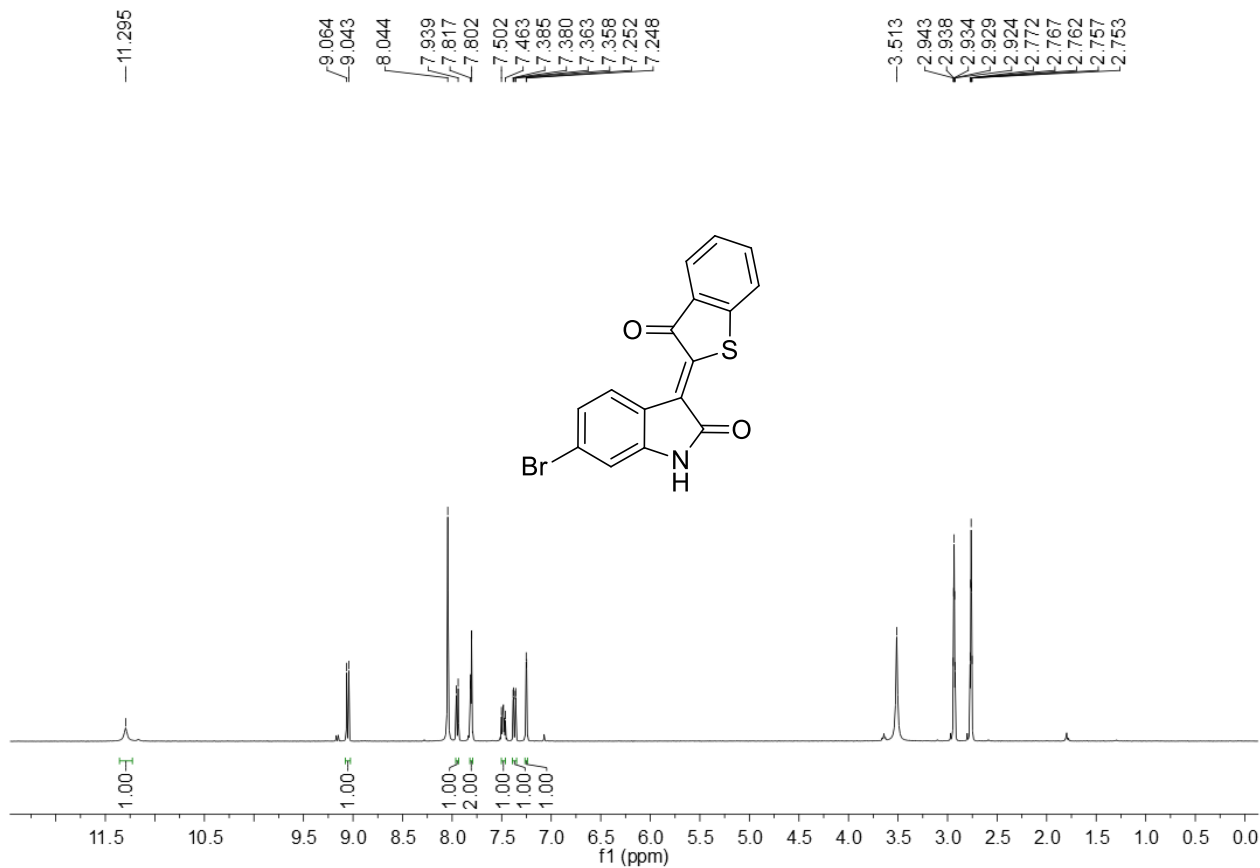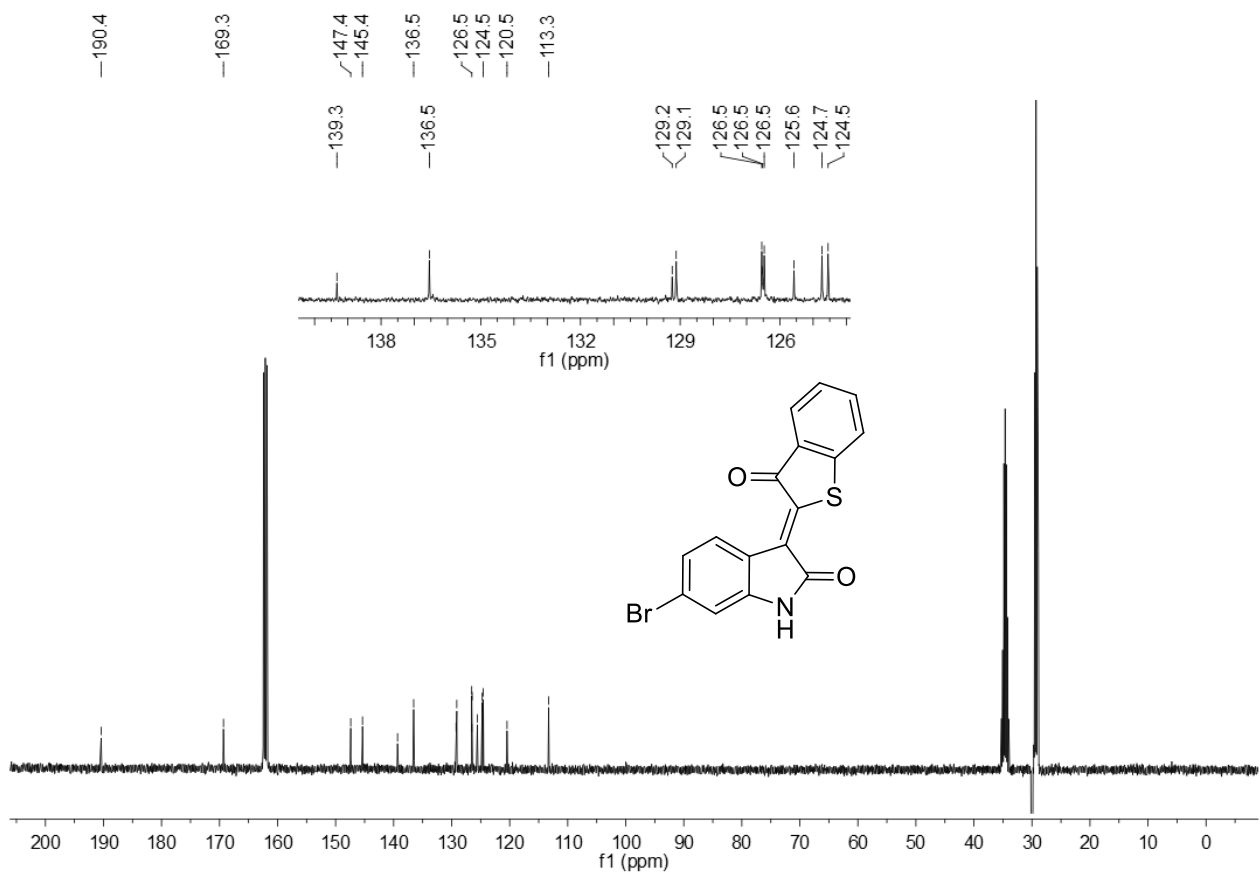

Supplement: c7ob01515a1.pdf [file c7ob01515a1.pdf]
